# Supplementary material for: Comprehensive Genomic Survey, Characterization and Expression Analysis of the HECT Gene Family in Brassica rapa L. and Brassica oleracea L
Source: MDPI journal article supplement (doi:10.3390/genes10050400), 2019-05-27
Supplement: s1 [file s1]

# Supplementary Information

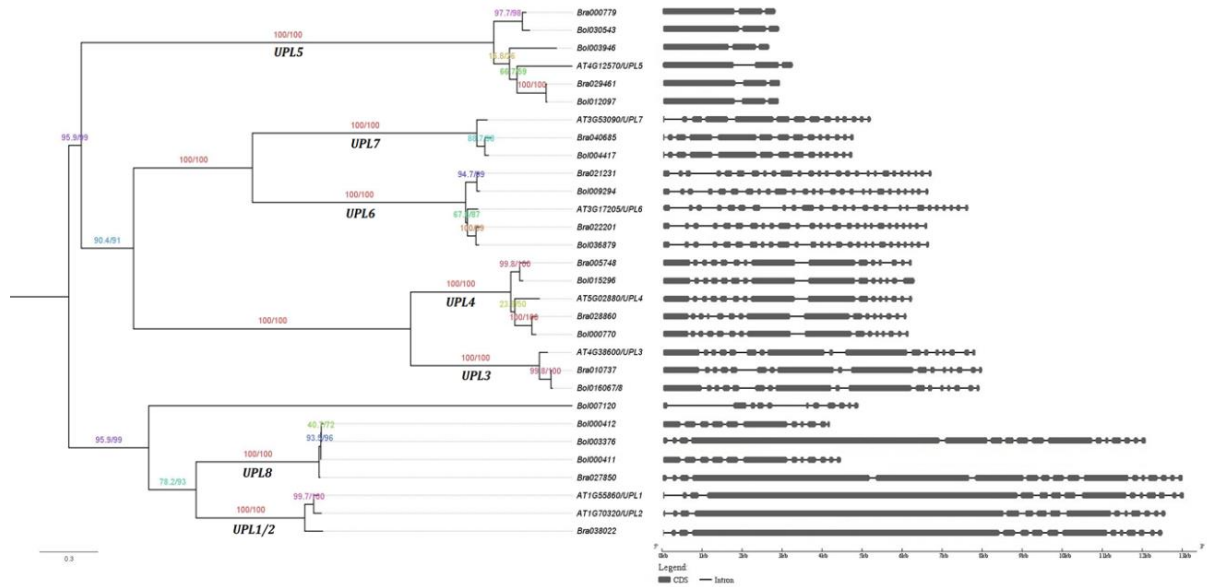

**Figure S1.** Schematic diagram of HECT protein gene structures in the encoded genome of *Arabidopsis thaliana*, *Brassica rapa* and *Brassica oleracea*. The maximum likelihood phylogenetic tree is provided on the left side of the figure, followed by the exons–introns on the right side, which are represented as grey boxes and black lines, respectively. The scale bar at the bottom (right side) indicates the lengths (Kb) of DNA sequences.

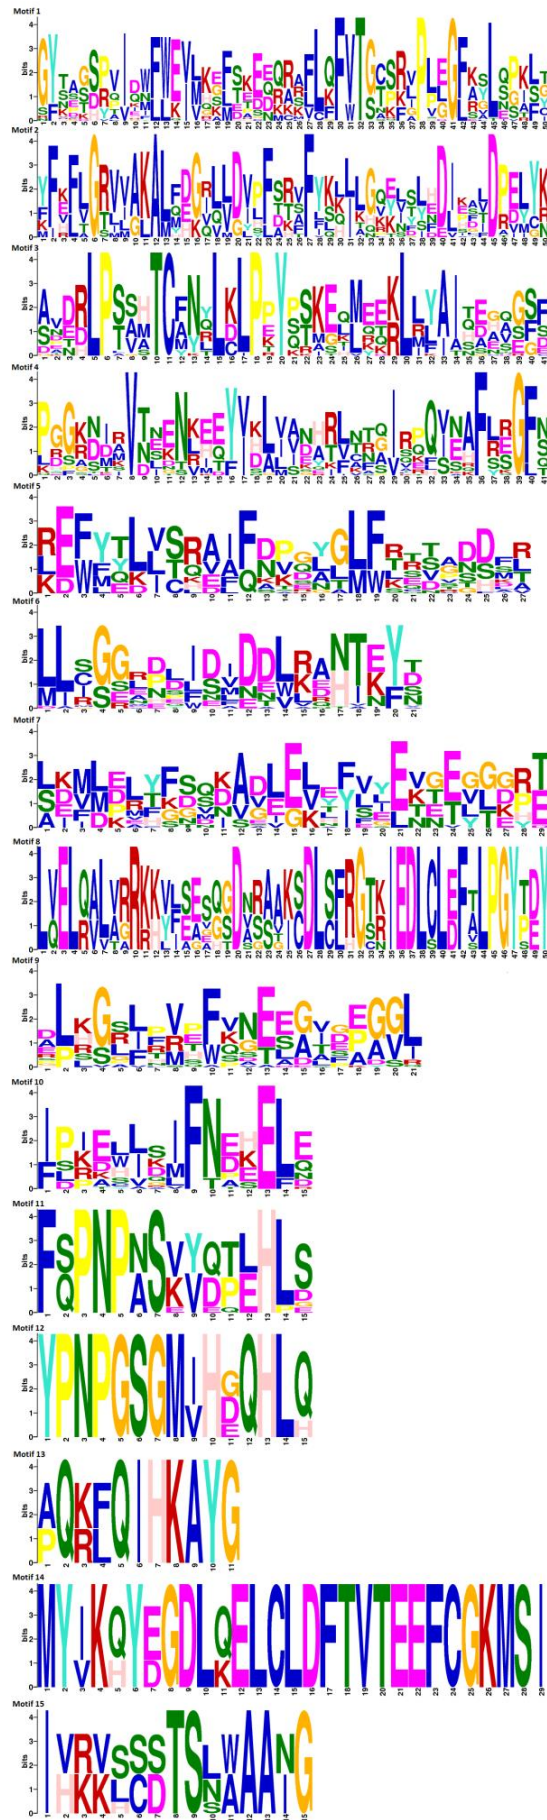

**Figure S2.** Sequence logos for the 15 most conserved motifs identified among the HECT domains of *Arabidopsis thaliana*, *Brassica rapa* and *Brassica oleracea* HECT proteins shown in Figure 2.

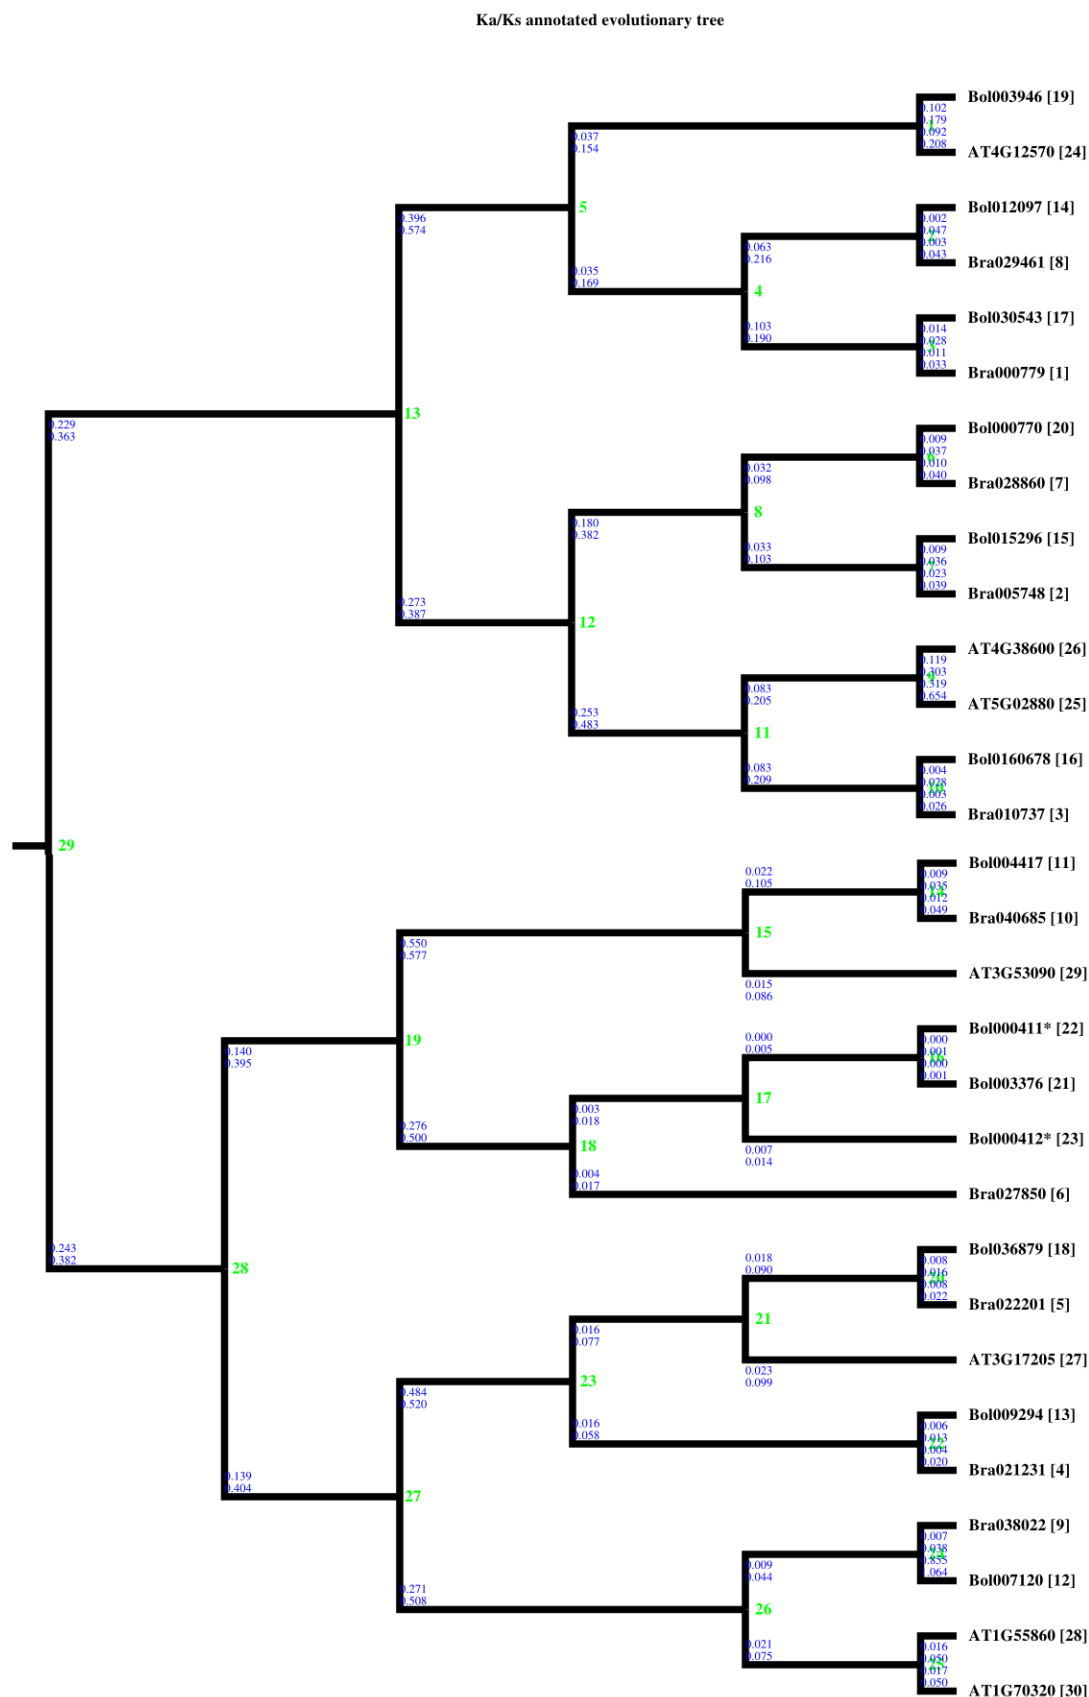

**Figure S3.** Ka/Ks annotated evolutionary tree of the HECT proteins genes from *Arabidopsis thaliana*, *Brassica rapa* and *Brassica oleracea*. The cDNA sequences and amino acid sequences of the HECT proteins from *A. thaliana*, *B. rapa* and *B. oleracea* were used to estimate the nonsynonymous (Ka) and synonymous (Ks) substitution rates and their ratio (Ka/Ks) for each node/branch using the online Ka/Ks Calculation tool at <http://services.cbu.uib.no/tools/kaks>. Twenty nine nodes are shown in green. The Ka and Ks values in each node and branch are marked in blue. All branches have Ka/Ks ratios less than 1.0, except *Bol000411* and *Bol000412* (marked in red) where both Ka and Ks equal zero.

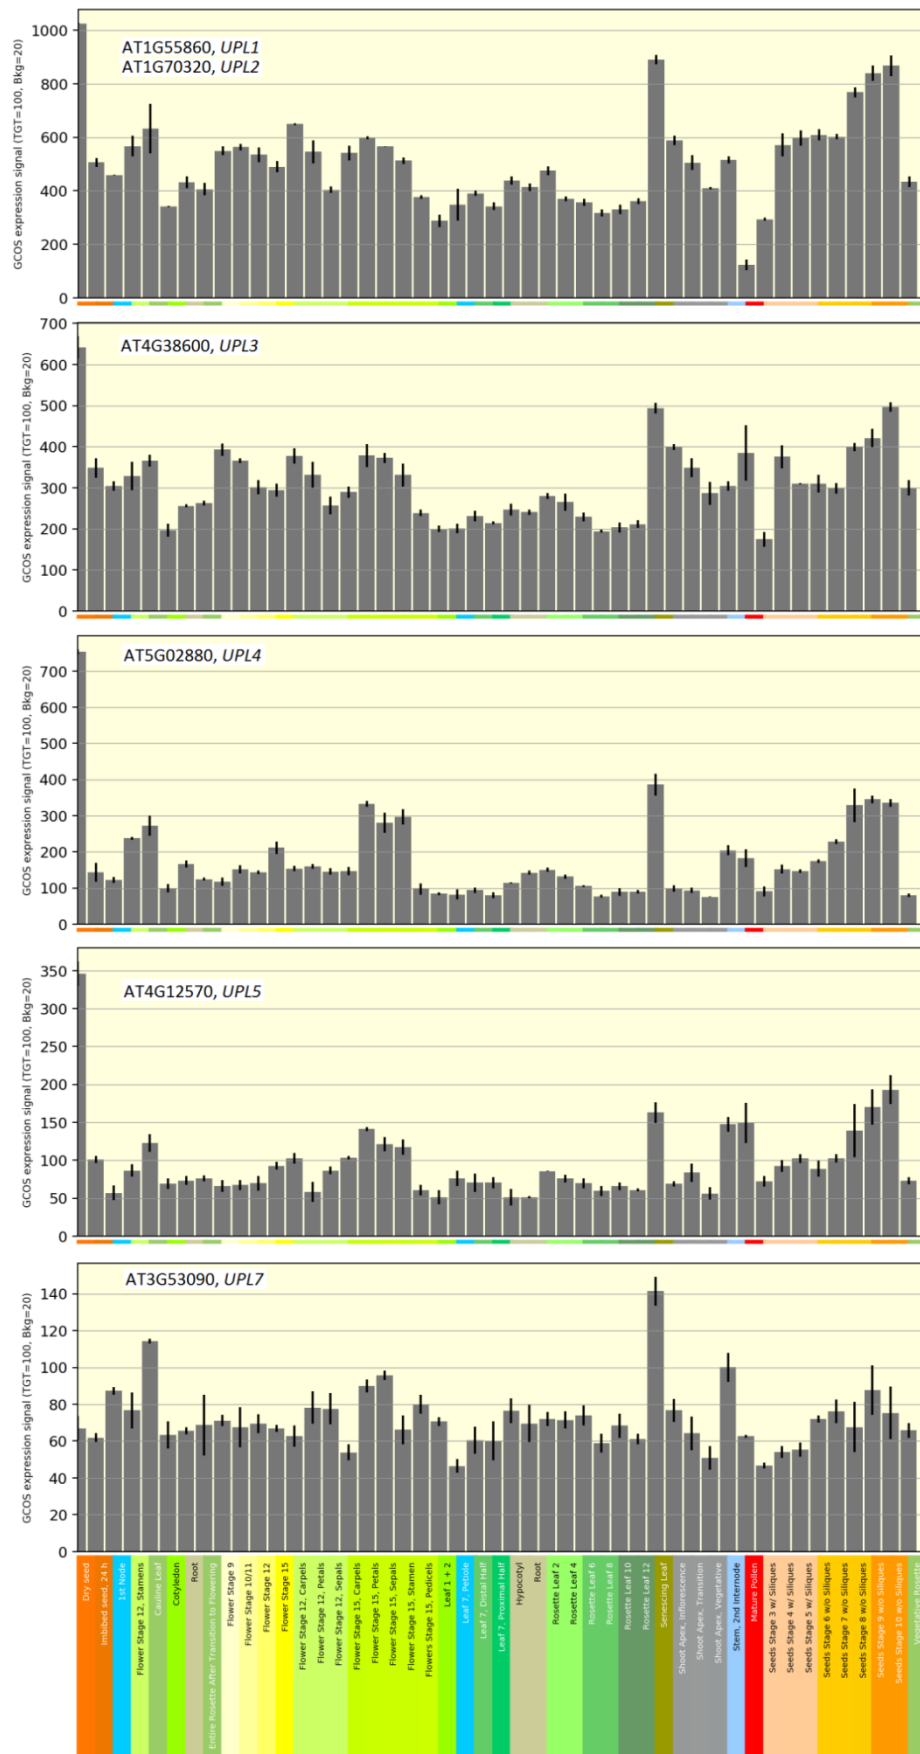

**Figure S4.** Expression values of *Arabidopsis thaliana* HECT genes in 47 developmental tissues. Charts of expression values were obtained from TAIR database (<https://www.arabidopsis.org/>) using the Arabidopsis eFP Browser. *UPL1* and *UPL2* share an identical chart, while *UPL6* is absent in the database. The 47 developmental tissues are indicated on the bottom with varied colors. GCOS, Affymetrix GeneChip Operating Software.

A

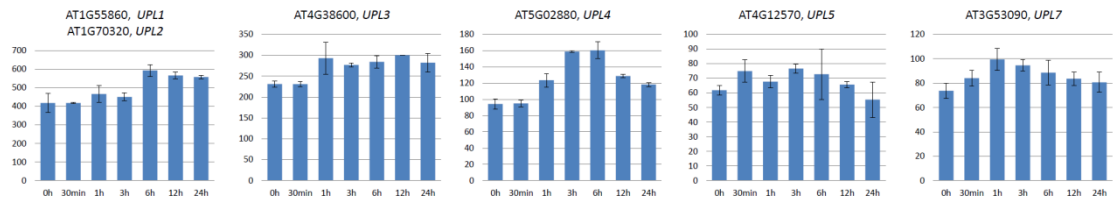

B

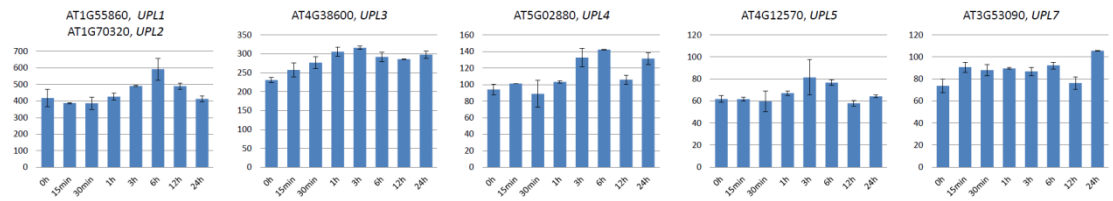

**Figure S5.** Expression patterns of *Arabidopsis* HECT genes in shoots (16 days after germination) under salt (A) and drought (B) stresses. Expression data were obtained from TAIR database (<https://www.arabidopsis.org/>) using the Arabidopsis eFP Browser. *UPL1* and *UPL2* share an identical set of data, while *UPL6* is absent in the database. The Y-axis values represent the expression levels generated by Affymetrix GeneChip Operating Software (GCOS). Salt stress was performed by transferring the plant in a media containing 150 mM NaCl. Drought stress was performed by exposing the plant to the air stream for 15 min with loss of approximately 10% of fresh weight.

**Figure 6.** Protein sequences of all HECT genes analyzed in this study. Green indicates the sequence has been revised by authors. Star (\*) indicates the partial-length sequence.

```
>Bra000779
MTLSRYSDNPKRKLLDDNGVDNNILHKMKRHEVDPDHTSPSQPPFPNWRSDENSPQNRYS
DDCSSSSSSSTESSTRSESTRQLQFVRMVSGGKTIVIQADKSDTVENLHKRIEVKTKIPV
NEQRVIYKKGQLQDERSLSYSSIAQDSSHLVGRMRSTDHPVACRVDDIMYIVSLMHRG
GGGGGNNNNLPRGMSINEKLSSFFSTIPTAGGDESSYIESTEKYLTIFTNSSVPAALV
MLYTSPLANKSCGESSIKLFLNSCLALPEEQGCCLPVVLEFCRLLRVCPhNSLYGSC
RNTLGSLLLETVQELVDKSGIEFTSLHYRLLTVGEEILPCLSELADLMEQQLYEDNLGPSL
YDVQKFSSFWRPLRYAIDFQLSSLIPIALPLRSTVLEAEVGRICQIFGRLLTMMHICMLR
IESSLGGRAVANTEAVALKWGQYLNILKIVNSMSELYQGGKEKVVRFINSRKVPFCALIL
KFVKRGDDHGWISYREATTFCRRHLAMMLFPDGKEDYSEMHEMLIDRSQVLKESYVYI
SQASPAGLHGALFMEFKNEEATGPGVLRWFYLVQCEIFSPGGTFLRSADDFRRFSPNP
ASKVDPLHLLEYFKFAGRVIALALMHKVQGVLFDRVFYQLTNQTIISLEDIKDTRVIYN
SCKQILEMDPVFFDSNAGLGLNFVLETEELGKRETKELIKDGKSTAVDSKNREEYVKLLI
SERFVTSVSELVEKFSEGFSDILSVPIQSFFRHLDDQEDFDGMLRGGENQISVDDWKAHE
YNGFKETDRQIDWFWKILRKMTEEERSVLFFWTSNKFIPLEGFRGLSSKLYIYRLHEAN
DRLPTSHTCFYRLCLPKYPTMGLMEQRLRFITQDHVSSSFGKW

>Bra005748
MENRGQKRMEDVEELPADKRACNSQDSRSSSSGGSSVQSQSQAANGASSGHETTDADMD
TSSSDSPSSSHSDGEFPDKEEEEEEDYGCSDSDDDDEEGEDPRHKALQDVQWGRSSEDQQKL
SSLVTRLSEEVDPQLTGLTELCEVLSFCTEDSLSTVMADTLRVLVVKLANHESNADIM
LLAIRAVTYLSDVYPRSAFLVKHETLPALCQRLQAIEYLDVAEQCLQALEKISKDEPVA
CLNAGAIAKAVLSYIDFFSTSLQRVAVSTVVNICRKLSSSESPSPMDAVPILCNLLQYEDR
QLVENVAICLTAKIADQVSESPEMLDQLSSHGLIHQSIHLLNLNGRTTSLQPVYNGVIGLL
RKLSSQNLFLHLEYFKFAGRVIALALMHKVQGVLFDRVFYQLTNQTIISLEDIKDTRVIYN
PSSPVEDNQLALEKESFLVNQPDLLQQFGADILPVMIQVISDIQLYGAKIWSERICFLWL
PISNPQADLLDVLGILSRKVHVHVVALQIAEALLGKYSDDFLNSFIKEGVYFAIEALI
NSGQQNQGSADGSEEHVPKETVKCLCQSFERSSSSSSQCKIEKDSVYILATRIKESFFG
PEVFDSDQKGLTDVLQNLKHLAALDDLMTEPIDAHALHDEKFFSVWSQIMERLNGRESVS
TFEFTESGVVKALTNLYLSNRLHQRKFSKGDSECDSLPFVGNRFEVFTSLWSDGEATSSV
LIKNLQNSLSLSENYPIVLSQFLKQRNSFATVPNGRSISYPILRVRFVKAEGETCLRDSY
QDLVTVDPLCLFDAVDQYMWPKVQLEPLYSVEEKDQAMECPSSQLESTISCSQGESSTHM
EIDSPNASQLQGSQEEDQQLPDSGEDNTSSSEEDALPEEDALPRLFLRLEGLELDRSL
TVYQAILLHKLKSGSETTNDKSLSGSHTITYERAPQLAESDENLFPGLGMDNDEYHPFLS
FLFAQRLLDLRHKATNPAYDMLFLKSLGEMNRFHLICHERINAFGEGRLENLDDLRLV
QLRPVPYAEFVSSKLTEKLEQQLRDSFAVSTCGLPPWFNDLMGSCPFLLSFSEVTKYFRL
AAFSGQKVHHHPQLHSEGRPVGTSLPRKFLACRETILESASKMMELHGNQKVIVIEVEY
SEEVGTGLGPTLEFYTLVSRAFQNPDLGMWRCDRSSFAGKPKEDSGFLVAPSGFLPRPWS
DTSAAFPDVLQKFVLLGTVVAKALHDGRVLDIPFSKAFYKLIIGQELSSFDIHFDPELC
KTLVELQALTRKKVFSESQTDARAACDLSFRGTNIEDLCEFLVPGYTDYVLALHSAN
DMVNLNDNLEEYIKAIVNATCNGIQKQVEAFRSGFNKVFPFIEHLGIFNEEELETLLCGER
DLFNLLLEILHFEFDKQQRALQFVTGCPRLPPGGLASLNPKLTTVRKRGSDSSETDLPSV
MTCANYLKLPPYSSKEKMEKLIYAITEGQGSFHLS

>Bra010737
METRSRKRAEATSTAPSSSSSSPPPPSSGPTTRSKRARLSSPSSSSAAA
TAPSSSTRSRSSRSTTATVATPMDTSTESSGFHRGGGRGNRGNDNTNS
DKGKEKEHEVRIRDRERDRARQQLNMDAAAAAAAADDDDDNDSDEGNG
GFMHPNMSSASSALQGLLRKLKAGLDDLPLSSGIGSGSSSHLNGRMKKV
LAGLRSEGEKQVEALTQLCEMLSIGTEDSLSTFSVDSFVPPVLVGLLN
HESNPDIMLLAARALTHLCDVLPSSCAAVVHYGAVSCFVARLLTIEYMD
LAEQSLQALKKISQEHTACLRAALMAVLSYLDFFSTGQVRVAVSTAA
NMCKKLPSDASDYVMEAVPVLTNLLQYHDAKVLEYASICLTRIAEAFAS
SPDKLDELGNHGLVTQAATLISASNSGGGQASLGVSTYTGILRLSTCA
SGSPLGCRITLLLLGISSILKDILSGSGVSANASISPALSRPADQIFEIV
NLANELLPPLPEGSISLPTSANALVKSGQKKSPSTSGKQEDSPKVSP
REKLISDQPELLQQFGLDLLPVLVQIYGSSVNGTIRHKCLSVIAKLMYF
STPEMIQSLIGDTNISSFLASVLAWKDPQVLVPALQVAEILMEKLPETF
SKVVFVREGVVHAVDQLVLVGKPSHASTDQENDCVPGSARSRRYRRSS
NANSNGNQSEELKNSVSASIGANHNSMESPTASFMLRETVSSCAKAFKD
KHFPDGDGEFDVGVTDLLHLKLNCTKLTAGTNDHKVKGKSKASGPC
LGDFSASKEEYLGIISEILGELSKGDGVSTFEFIGSGVVAALLNYFSY
GYFSKEKISEVDLPKLRQDGLRRFTAFLAIALPSDGNEGKIPPMTVLIQ
KLQDALSSLERFPVVLSHPSKSLSGSARLSSGLSALAHPLKRLCRAPG
EKALRDYSSNIVLIDPLASIAAVEEFLWPRVQRSESGVKPAAPVGNTEP
GTLPSGAGVSSPSSSTPASTTRHSSRSRAIKIGDASKKEPVHEKGTSS
SKGKGVMKPAQPDKGPQTRSSAQKAVLDKDTLMKPAASGDSSSEDEMD
ISPVDMDALVIEEEDISDDDEDDDEDVLDNLPMTCTPKVHVDVKLGD
AVDDEGAGLAPSGRQMNSALAGSSGTATARGSNSTDAGIGNLYSGRGAL
SFAAAMAGLGAASGRGIRGSRDLHGRTLNRSSDESSKLMFTAGGKQLS
RHMTIYQAVQRQLMLEDDEDDRLGGSDFISSDGSRLNDIYTIMYQMPDS
QANRLSAGGASSTPSKSTKSATTNASVEAQSYRASLLDSIVQKGLPCD
LEKSNSTYNVLAALRVLEGLNQLGPRLRAQTVSDRFAEGKITSLLDLNT
TAAKVSHHEEFINSKLTPKLARQIQDALALCSGSLPSWCYQLTTACPFLL
PFQTRRQYFYSTAFGLSRALNRLQQQGGADGSGSTNEREMRIGRLQRQK
VRVSRNRLDLSAAKVMEMYSSQKAVLEVEYFGEVGTGLGPTLEFYTLIS
HDLQKVSLGMWRNSNGDKLSMQTDRDEIQDGKSAAADRDIVQAPLGLF
PRWPSTADVSEGRFHKVVEYFRLLGRVMAKALQDGRMLMDVPLSTAFY
```

KLILGQELDLDHVLFDDELGKTLQELRVLVGRKHYLEAGGGDNSSGIS  
DLCLRGSRIEDLCLDFTLPGYPEYILRPGDDIVDINSLEDYISLVV DAT  
VKRGVARQIEAFRSGFNQVFDIKSLQIFTPSEL DYLLCGRRELWEAETL  
VEHIKFDHGYTAKSPAIIIFLLEIMGELTADQQRAFCQFVTGAPRLPPGG  
LAVLNPRLTIVRKLSSTSNAAANGTGASETADDDLPSVMTCCANYLKLPP  
YSTKEIMYKLLYAINEGQGSFDLS  
>Bra021231  
MFFSGDPSTRKRVDLGGRSTKEGDARKLLEQTKMERNRRLLOKKHNSAAL  
KIQKVFGRGRSTAIVRSKVRDFCETYGDNCQNVDRHCFEPASSFLPQF  
LFFFKAQSSGDFVMLVETCRLLRKFHSSGDI LSLFSGLDYSSEHNMD  
FRVKKLAFTCIEAIHQNRDRLDQLLVTPPEATISTAILMDAMSLLLDP  
KLPWVKCIVSYLQKRNI FKL VREIVTTAKEGSRSP TMNGSILSLESVLF  
LVVPHVGREPCCCPVVDPRWSFSSMILTIPFIWQLFPNLKVVFANPSLS  
QHVVHQMALC IQK DTHVLPIDTNT EFPGNACLLGNTLEIANVVL SQPEC  
SLDMAIDIASVATF LLETLPPIKSSERESRHSSEEDDDMLIDDVQELV  
LNR TLEQQIT TN AIDSRFLQLTNILFHQVSGGTQSYDEDEKALAIATG  
SSFLYAAFNILPLERIMTVLAYRTELVAVLWNYMKRCHENQKWSMPSV  
LAYLPADSPGWLLPLVVF C PVYKHMLTIVDNEEFYER GKPLSLQDIRLL  
IIILKQALWQLLWVNPLTQHNSGISVSNDSL SKNRVDLIQNRVGVVIAE  
LSQFQDWNNRQQFTSSTDFQADTVSEYFITQAIVEGTRASYILMQAPF  
LIPFTSRVKIFTTQLATARQSHGSEEIFAGNRFRIIRDHILDDAYNQMS  
ALSEDDLRGP IRVTFVNELGVEEAGIDGGGIFKDFMEKITLAADFVQYG  
LFKETVDHMLYPNPGSGMIHQHLQFFHFLGSL LAKAMFEGILVDLPFA  
TFFLSKLKQKYNYNLNDLPSLDPELYRHLIFLKRYKGDISDLELYFVILN  
NEYGERTEEEELLPGGKDMRVTNKNVITFIHLVSNHRLNFQIRQQSSHFL  
RGFQQLIPREWIDMFNEHELQVLI SG SADS LDIDDLRENTNYSGGYNAG  
HYVIDMFWEVMKSFSTENQKKFLKFVTGCSRGPLLGFKYLEPAFCIQRA  
GGSVSNEAVDRLPTSATCMNLLKLPPYQSKEQLETKL MYAISAEAGFDL  
S  
>Bra022201  
MFFSGDPSTRKRVDLGGRSTKERDAPK LLEQTRMERNRRLLOKKQNAAAL  
KIQKFFRGRRSVAIERSKVRREFCETYGNNCQNVDRNCFEPGSSFLRQL  
LFFFKAQNSGDFVILVETCRLLKIFTHSNGDILSLFSGLDYSAEHNLDV  
FRVKKLAFTCIDAIHNNRDLRDQLLVTT EEA STAILMEAMSLVLDP  
KLPWVCKTVSYLQKRHIFQLVRDIVITAKESPRGQTMIGSILSLERVLI  
LVVTHVGREPCCCPVVDPRWSFSSMILTIPLIWQLFPNLKVVFANPNLS  
QHYIHQMAFCIQK DTHVLPDTSAEFFPGYACLLGNTLE TANVVL SQPDC  
SLDMAVDIASVATFLLERLPPVKSSERESKQSSSEEDDMLIDDIPEFVL  
NKTLEQQIT TN AIDSRFLQLTNVLFHQVSLGTQPYDEEKEARAIGTAS  
SFLYAAFNLTPLERIMTVLAYRTELVI VLWNYMKRCHENQKWSMPNLL  
AYLPGDAPGWLLPLVVF C PVYKHMLMIVDNEEFYEREKPLSLQDIRLLI  
IIILKQALWQLLWVNPLTQ PSTGKSVSNLSKKNPVGLIQNRAGVVVAEL  
LSQLQDWNNRQQFTSSSDFQADTVNEYFISQAIAEGTRANYILMHAPFL  
IPFTSRVKIFTTQLATARESHDHGSQAI FARNRFRIIRDHILEDAYNQMS  
SALS EDDLRGSI RVT FVNELGVEEAGIDGGGIFKDFMEKITRAADFVQY  
GLFKETVDHMLYPNPGSGMVHDQHLQFFHFLGTLLAKAMFEGILVDIPF  
ATFFLSKLKHKYNYNLNDLPSLDPELYKHLIFLKRYKGNIAELELYFVIL  
NNEYGERTEEEELLPGGKDMRVTNENVITFIHLVSNHRLNFQIRQQSSHF  
LRGFQQLIPKECIDMFNEHELQVLI SG SADS LDIDDLRQNTNYTGGYNA  
GHYVIDMFWEVLKSFSTENQKKFLKFVTGCSRGPLLGFKYLEPAFCIQRA  
AAGSASNEAVDRLPTSATCMNLLKLPPYQSKEQLETKL MYAISAEAGFD  
LS  
>Bra027850  
MATGRSASMPSRLRQLLSCEGSIGPSIRRD AEPPPEIKSFIEKVIQSPLS  
DIATPLSGFRWEYSKGNFHHRPLFLHF DKYFKTFLSTRNDLLLSDHIL  
EDEDFFPKYSLQLLRVMQIILENC PNKSTFDGLEHF KLLLASTDPEVL  
IAALETLSALVKI SSKLHRSGLIGCGSVNSFLLSIAQGWGSKKEGLG  
LYSCVVANERNQEGLTIFPSDL DNNHKEADFRIGSTVYFELRGHSAQS  
IHGTSSASSSSSRVIQIPDLHLRKEDDLVLLKECIEHYNVPPDLRFSL  
LTRVRYAHAFRRSSRICRSYSRICLAFIVLVQSSDAQEELASFFANEPE  
YTNELIRIVSEEP I PG TIRTLAMALGAQLAVYSASHDRARILSRSSI  
SFAVGNRMILLNVLQKAVLSLKISSDPSSIAFVEALLQFYLLHIVSSSS  
SGSTIRSGMVPTFLPLLEYTDPSHLHLVYLAVKALQKLM DYSSAVPL  
LRDLGGVELLSQRLELEVHHILKLTGENNSDMVVGESLDINGDQLLSRK  
RLIKVLKSLGSSYTTPGNANRSQSSQESTLPATLSLIYRNADKFGGDI  
YYSAVTVMSDLIHKDPTSITSLFEMGLPEAF LSSVVGVLPS SKAIACI  
PNGLGAISLNSKGL ETVKETSALRFLVDVFTSKKYVLAMNEAIVPFTNA  
VEELLRHVSSSLRATGVEIIIEIVDRIACFGESGSSSSSVSTAMEMDS DV  
KNINGVSHQFVQLCIFHLIILLHRTMENAETSRLFVEKSGIEALLKLL  
LRPSIAQSSSEGVSI ALHSTIVFKGFTQHHSASLARAFCS SLRDQVKKAL  
GGLQDLSGTFL LDRKLS PSCGIFSSFLVEFLFLAASKDNRWMTALLS  
EFANGSKDVLENTGLLHREILWHIAVYESGTLES PNTSPESQE TELSSN  
GTEGQRFSFQFLDPLFQRRTSGWSAESQFFDLINLYRDLGRASTGFQ  
PRPISDGPSSSSDASGNRELERDGSYYTSCCDMVKSLSFHITYIFQELG  
KAMLLQSRREDTVNVSPSSKLVASSFASISLDHLNFEGHEIAAEASRS  
TKCLYLKGKVVDFIDAVLLDRPDSCNPVLINCFYGRGVIQTVLTTFDATS  
QLLFSINRSYSPMETDDVKGQDEKEDTDHAWIYGPLAGYGKMLHLV  
TSSFILSPSTKHL LVQPVENGNI PFPQDAET FVKILQSIVLKAVLPVWT  
HPLFTECSYDFVTALISIKHVYSGVELKSLAGSSSARV TGP PPSETTI  
STIVEMGFSRSRAEEALRQVGSNSVELAMEWLF SHPEEIQEDDELARAL  
AMSLGNSESDTKENVVDE TREQIEAEIVSLPPVEELITTCTKLLQMKEP

LAFPVRDLLVLICSENNGEHRSGGICCLLSRIKDCCPVFD DTKNNLLSA  
LLHVLA LIL LHEDAGSREVALKAGTVRLVCDVLSKWDSGSIDKEYNVPK  
WVTTGFLAIDRLLQVDQKLNTELIEELQKGETSLAIDSKQDKLQSVFG  
SPQLVDADQKKLIEIACTCIRNQLPSETMHAVLQLCSTLTRKHSVAVC  
FLDFGGVQGLLSLPSNSLFPFGFDSVAASIIRHVLEDPQTLQQAARSICQ  
VEMVGERPIVLVKEKEKSKDKDKDKDRADKEKSQTSNEVATTPPG  
STKAKVYRKPPQSFIGVVELLLDSL CNFVPPPKDDMVEGDST SADMDID  
HASTKGAKGAVATPAEKKAISQGMSASLAKIVFILKLLSEMLLMYSSS  
IHILRRDAEIKSLRGPQKKGQVGGIFHHILRKFI PYSRVMKEKKSES  
DWRQKLASRANQFLVGASVRS AEARKRIFSDISSIFNDFIGTSNGLRPP  
VNEIHVLIVLLNDMLSARSPTGSHISSEASNTFVDVGLVKS LTRTLEVL  
DMSASLAKIVFILKLLSEILFMYSSSIHILRRDAEIKSLRGPQKKGQ  
VGGIFHHILRKFI PYSRVMKEKKSES DWRQKLASRANQFLVGASVRS AE  
ARKRIFSDISSIFNDFIGTSNGLRPPVNEIHILIDLLSDMLSARSPTGS  
HISSEASNTFVDVGLVKS LTRTLEVL DLDNVESPKTVTGI IKVLELVTK  
EHAYSADSSKNETANNSSDQIQSGRGDTADASEAGEIMLRSNHDSMT  
ADHAENFGGSHTFVGSEDVTD DMEHDQDLDEGFAAGVDDYMQEE PEDAR  
GLENGIGSMGIEFEMHTHPENLDEE DEEMSGDEGDEIDEDENDNEEE  
DEEDNDLEEEEEEDVHHLPHHDTDQDDHELEDEFEFEEI LVEEDEEDED  
DEDRVILRFEDINGLNLVDHLEVL RDRHRSDET LHVMPVEVFGSRRQG  
RTTSIYSLLGRTGDGATPSQHPLLSGSPSLQGSQSQTSTH DHTVGGRD  
SNGSSSSRLDAIFRSLRNRGRQHRLNLWADDSQQIVGSGASTVPQGLED  
LLVSQ LRRPGSDNPSDQNPSPLEPQSQAESGQPQEATVRPEIPDENATG  
NGGANVSAPSI VSPVASAPPDTRATATDSVSSSRSQSVEMQYDLIPDENA  
TGNGGANVSAPSI VSPVASAPPDTRATATDSVSSSRSQSVEMQYDPNDS  
TVRDVEAVSQESGSGGATLGESL RSLDVEIGSADGHDDGAERH DVPAM  
RSRRANLSVVPSSTGREASLYSVTEVPENSGHEAEQDN PPEEQPVNRDV  
ASSSIDPAFLDALPEGLRAEVL SAQQGAPEPSSNEQQNSGDI DPEFLA  
ALPADIRAEVLAQQQAQRVHQSHELEGQP VEMDTVSI IATFPSELREEV  
LLTSDDAVLANLTPALVAEANMLRERFAHRYHN RALFGMHPRRRGEAS  
RRGEGVISGNEG IASRRSAAKVIEAAGAPLVNTEALQAMIRVLRIVQPL  
YKGPLQRLLNLNLC SHGETRFSLVNTFMDMLMLDTRKPVNYS SVSEPPYR  
LYACQSNVTYSRPQHFDGVPPLVSRRVLET LTLYLARNHIYVAKILLQSR  
LSLPSLQGSVPSPDKARGKAVVVSDDHMSRTQQEPESVAFALLSL LNQP  
LYLRSVAHLEQLLN LLEVIIDNAERKSESADGSDGSASEQQSTHQALEV  
ENNAENHDMVSGTAGTVTKPIVSSGSSSYRAESEC DVHTVLLNL PQSEL  
CLLCSLLAREGLSDNAYTLVAEVLKKLVAIAPSHCHL FITELANAIQNL  
TRSAISELHMFG EAVKTLSTTSSD GSGVLRVLQALSSLVDSLLITKEK  
NSEEHVAVFCQLSNINLALEPLWLELSNCICKIEGHSDSASASTSPTT  
STSSATRGAGVSQSLPAGAQNM LPYVESFFVTCEKLHPSSQSCDISVP  
MAASDVEEQPKGPGPSSSSKVDEKYGSFIKFSEHRKLLNAFIRQNPAL  
LEKSFSMLMKVPRFIEFDNKRAYFRSKIKHQHDHHSPLRISVRRAYIL  
EDSYNQLRMRSTQELKGR LTVHFQGEEDIDAGGLTREWYQLLSRVIFDK  
GALLFTTYGNDSTFQPNPNSVYQTEHLSYFKFVGRVVGKALFDGQLLDV  
HFTRSFYKHI LGVKV TYHDIEAIDPDYKALKWMLENDISDVLDTFSV  
DADEEKLILIEKTEVT DHELIPGGRNIKVTEENKHEYVDLIAEHLRTTA  
IRPQINAFLEGFSELILKDLISIFNDKELELLISGLPDIDLDNLRANTE  
YSGYSPGSPV IQWFWEVVQGLSKEDKARLLQFVTGT SKVPLEGFSSLQG  
ISGAQKFQIHKAYGSANHLPSAHTCFNQLDLPEYPSKEHLQERLLLAIH  
EASEGFGFG  
>Bra028860  
MENRGQKRMEVVGEP PADKRACNSQDFTSGASSAQAQQANGNTDADMDTS  
SSASPSSRSDEQDREEEEEESDYGSCDSDDEDPRRRVLQRYQRGRST  
GDQLKLKSLASRLSEENDPSLQLTGLTELCEVLSFCTEDSLSI VMADLL  
SRVLVKLAKHESNADIML LAIRAVTYLSDVYPRSAFLVKHETIPALCQ  
RLLTIEYLDVAEQCLQALEKISRDPVACLNAGAIMAVLSYIDFFSTSI  
QRVAVSTVNNICRKL PPEPPSPVMDAVPVCNL LQYEDRQLVESVAICL  
TKIADQGVIGLLRKLSSGSTLAFRTLYELNIGYRLKEIISTYDISHSVS  
STQPIHPCSNQVHEVLKLVIELLPASPVGDNQLALEKESFLVDQPNLLQ  
QFGADM LPMVTQVLKSGASVYVSYGCLSAIHKLTCLSKSDDLVELLNNA  
NISSVLAGIFSRKDHVVVVALQIAEV LLEKYRDAFLNSFIKEGVFFAI  
AALLTSDRGQQINPVSGFIQGSVPKEIVKCLCQSFEGSVSSSSQTCKVG  
NDSVYILATRIKESFFGPEVFD SQKGLTDVLQNLKLSAELNDLVTPVP  
DAHVLHGERFFSIWNQIMARLKERESVSTFEFTESGVVKALANYLSNGL  
YERKLNKGDEPCDSLPLVGNRF EVFTRLLWSDGEATPSALI QKLQNSLS  
SLENYPIVLSQFLKQRNCFAAIPNGRCISYPVLRVRF AKAEGETCLR DY  
SPNFVTVDP L CYLDAVSQCLWPQVNLEPLNSVEAKDQAIECQSSQLQST  
SISCQGESSSHMEIDCPNASQLQGSQEEEDQYHLIDSGEENSSSSKEED  
VRPRLFRLEGLELDP SLTVYQAILSHKLKSENETTNDSKLSGHHTITY  
ERAPQLAVSHENLFFLRSMDNDEHHPFLSYLFAHRLGLRHKGTSPP EYA  
ILFLLKSL EGMNRF LFQLICHERINAFGEGRLESDDLTVQVRVPYAE  
FVSSKLTEKLEQQLRDSFAVSPCGLPPWFNDLMASCPFLFSFEVKS KYF  
RLAAFPGQGVHNQPQHLGSSNVHGS LPRKKFLACREKILESAAKMME LH  
GTQKVAVEVAYSEEVGTGLGPTLEFYTLVSRAFQNPDLGMWRSDPSSLA  
GKPMVPPSGLFP RPWSATSAAFPGLVKFVLLGTVVAKALQDGRVLDIP  
FSKTFYKILILGQELSSFDIHFVDP ELCKTLVELQALARRRKVIS ESQSD  
VRAAKCDLSFRGT KIEDLCLDFSLPGYTDYVLSPRFANDMVNLGNLEEY  
VKAIVNATVCNGIKKQVEAFRSGFNKVFP IEHLKIFNEEELETLLCGER  
DLFNMNEVL DHIKFDHGYTSSSPVQNLLEILHEFHKEQQRAFLQFVTG  
CPRLP PGGFASLSPKLTIVRKHGSDSSETDLP SVMTCANYLKLPPYSSK  
EKMKEKLIYAITEGQGSFHLS

>Bra029461  
MTLRRSTAADSPISHRSPLAVAGTDNHKRKLLDDYAADYGLDLLQKMKRHE  
VDADRISPASQQKPLTSGENYRSLYTPGECSSSSSPSSSSSLPESWTRS  
ESTRLQLFVRMMSSGKTIIVIHADRNDTVEHLHHRIQLKTKIIPVTEQRVI  
YKKGQLQFEHTLNHYSIEQDSSLHLVGRMQSTEYPVACQTVDEIMSTIS  
RMHRGENLYGGRTNINDKLVKFFARI PAESNRSSAKYLYKIFSNSVPAAL  
LVMLFVSPLEINKACGKSSIKLFLNSCVALPVHQNSCLPVVLEFCRLL  
RGACPDQLTYFASCRNTLGSMMLDLVCKSDEFQFRLFTIGEETIYPCVTELA  
DIIIVRELVENTGPGLESEVQKFSSFWQPLKRAITAQLPCLFPVAMPLRNT  
VMEAEIGKLFQIFRRLMTVMDICMTRIESSLGNRGVANTEAMSAWTSQY  
LAVLKIVDSMCELYQGAKEQLASLLNARKVSFSAVLVLFKAKRGDDDHQW  
IFDYKEATTFESRRHLAMLLFPDVKEDYDEMHEMLIDRSNLFASFETI  
SGATPGSLHSGLFMEFKNEEATGPGVLREWFYLVQCIEFNPRNALFLRS  
ADDFRRFSPNPASKVDPLHLSYFEETGRVIALALMHKVQGVLFDRVFF  
SQLAHPEISLEDIKDTRVMYNSCKQILEMDPAFFDSNAGLGLTFELET  
EELGKRETVELLPDGRSIAVNSENREQYVKLLIKQRFASISQHVRFES  
KGFSDILSDSVPAFFKRIYLEDGMLRGGENPISIDDKAHTYNGFK  
ETDRQIDWFVKIMKKMTEEERRSVLFFWTSTKFIPEVEGFRGLSSKLYIY  
RLHEANDRLPTSHTCFYRLCLPKYPTMGLMEQRLRFIAQDHVSSSFGKW  
>Bra038022  
MPSQVQPPKIKSFINSVTAVPLDQIQEPLSCFHWDFDDKGFHHWVDFLN  
HFDITYFEKHIAKARDLHVEQQDSEDESTPPLPKDALLQILRVIRVVDLN  
CTNIHFFTSYEQHLSLLLASTDTDVVEACLQTLASFFKRQNDIYFIRDA  
SLNSKLFSLAQGWGGKEEGLGLTSCATTENTCDLVSHLLGSTLHFEFYA  
SGESSTELPGGLQVIHLDPVSLRAESDLELLNKLVTDHNVPSPSLRFVLL  
TRLRFARAFSSSLTRLQYTRIRLYAFILLVQASGDTQKVVSFFNGEPEF  
VNELVTLLSYETTVPEKIRLLCLLSLVALSQDRTRQTTVLTAVTSRGLL  
SGLMKFAIDSVLCNTSKSSLAFAEALLSLVTVLVSSSSSGCSAMQEAGLI  
PILVPLIKDTPQHHLVSTAVHILEAFMDYSNPAAALFRDLGGLDLDTI  
FRLKLEVSRTEEDNVNEKVCSDSNGRASHVLGDSLNRPDTEQLPYSEAL  
ISYYRRLLLKALLSAISLGTYSFGNTNLYGSEESLLPECLCIIFFRAKY  
FGGGVFSLATTVMSDLIHKDPTCFNTLDSSGVTS AFLDAISDEVICSAQ  
AITCIPQSLDALCLNNSGLQAVKDRNALRCFVNIFTSSSYLRALTGDT  
SALSSGLDELLRHQSSLRITYGVDMFIEILNSMLIIGSGMEASTSVSADV  
PTDAATAPMEIDADEKSLAISDEAEPSSAASPANTELFLPDCVCNVARL  
FEIVLQNAEVCSLFVEKKGIDVVLQLLSLPVMPLSTSFQGNFSVAFKNF  
SPQHSASLSRTVCSYLRRERLKGTNELLGAIKGTQLLKLESQVMTILRS  
LFCLEGLMLSLSNFLKGTSSVIAELSAADADVLKELGLTYKQIIWQMAL  
SSETKEDEKKSVDGGPDNSILASSSTVERESEEDSRNASAVRYTNHVS  
IRRTSQSIWRGGRDLSVMRSIESMHGRTRQAI SRTRGGRTRRRHLEAFNF  
DSEIIPDLPGTSSSHELKKKSTEVLTVEILDKNCTLRLLFFFTALVKGGF  
TSANRRRIDGAPLSASAKKTLGNIAKVFLEALNFDGNGVTAEHDFLS  
VKCRYLGKVVDDMASLTFDTRRRVCFTAMINSFYVHGTFKQLLTFEAT  
SQLLWTVPFVSVTASDTENEKPGERNIWSRKTWLVDTLQIYCRALDYFVN  
STFLLSPASTSQTQLLVQQEQASIGLSIELHPVPREPETFVRNLQSQVL  
DVILPIWNHPMFPDCNPNFVASVTSVLVTHIYSGVVDATQNGARGTNQRA  
LPLQPDETIVGMI VEMGFSRSRAEYALRRVGTNSVEIAIEWLFANPEHT  
VQEDDELAQALALSLGNASKTPKPVDPVPLEADPKPSVDEVITASVKL  
FESDDSMAPFLMDLFTVTLCSRNGEDRPKIVSFLIQQKLKLVQVDFSKDT  
GALTMLPHILALVLSEDDNTREIAAQDGIVTVAIDILTNFKLKSESESQ  
ILAPKCI SALLLILSMMLQARTRISSEFLEGNHGGSLSPDY PQDSAAA  
LKKVLSSDVAKEESKPDLESVFGKSTGYLTMEEGQKALLIACGLVKQCV  
PEMTIAQVLQLCARLTKTHALAIQFLENGALSSFLNLPKKCFPPGYDTV  
ASVIVRHLVEDPQTLQIAMESEIRQTLGKRHVGRVLPQTFLTMAPVI  
SRDPVVFMKAVASTCQLESSGGRDFVIPSKEKEKPKVSSSEQGLPLNEP  
LRISENKLHDGSGKCSKSHRRVPANFIQVIDQLIDIVLSFPRVKRQEDD  
ETNLIAMEVDVPATKVKGKSKVGDPEEAEEFGSEELARVTFILKLLSDIV  
IMYLHGTSVILRRDTEISQLRGSNLPDNSPGNGGLIYHIIHRLLPISLK  
NSVGSEVWKEKLSKASWFLVVFCSRSSEGRRIISELSSVLSVLASLG  
KSSSSKSVLLPDKRVLAFAAGLVYSILTKNSSSSNLPGCCGSPDVAKSMI  
DGGIIKCLTSLHVIDLDHPDAPKLVTLLILKSLETLTSAANTAEQLKSA  
GSNETKGTDSNERHDSRGTS TEAEVDESNRNNSLIQVTDAAENGQEHF  
QISSQSEGGGSSQTQAMPQEMRIEGEETILPEPIQMDFMGEEDDQIEM  
NFHVENRAGDDGDDAMGDEEDDDEEGFDDIGPELEDDDEDADLVADGARS  
VMSLSGTDADDPEDTGLGDEYNDDMIDEDEDDIHENRVIEVQWREALDG  
LDHFQILGRSGGGNEFIDDFEGMNMGDLVTLQRPGFDRRRQADINSFHR  
SGSQVHGFGHPLFSRPLRTGNTASVSASAGRNDISQFYMFDMPIVFPDQ  
VPSNPFSDRLGGSGAPPLTDYSVVDMDSSRRGVGNSRRTDIGHQPQSS  
QSAIAQLIEEHFISNLRASALADSVVERETNSTEVQEQQHPVSGSEV  
LGDGNDGGQQSEAEHMLNNDNDVNDNPPDVTAGIFSQARANLASPVLLQP  
LPMNSTPNEIDRMEVGEQGVPIEQADVAVDLVSTAQQPDTSSSQNV  
SGMGTPIPVDDPISNCQPSGDVHMSDGAEGNQSVESPLLSRDNNELSSR  
EATQDASNDQLAEGSLELDGRAPEANSIDPTFLEALPEELRAEVLASQ  
QAQSVQPPTYEPPSVEDIDPEFLAALPPDIQTEVLAQQRVQRMHQSQG  
QPTDMDNAGSIATLPADLREEVLLTSSEAVLAALPSPLLAEAQMLRDR  
MSHYQARSHSNRRNGLGYNRLTGMNRNVGVTIGQRDVSSFADGLVKEM  
EGDRLVDVEALKSLIRLLRLAQPLGKGLHRLLFKLCAHRGTRANLVQL  
LLDLIRPEMETSPSELAISNQQRLYGCQSNVIYGRSQLLNGLPPLVFRR  
VLEVLTYLATNHS AVADMLFYFDSSLVSQLSKPKPSVCEGKGKTEVTHV  
TDSRNLEIPLVVFLKLLNRPQLLQSTSHLALVIGLLQEVVYTAASRIEG  
WSPLSSLSKSEKPKVGEAEASSTRKDAKSEQVDEADKQSVARVKNCAD

IYNI FLQLPQSDLCNLCLLLGYEGLSDKIYLLAGKVIKKLAAVDVAHRR  
FFAKELSQLASGLSASTVRELATLSNTEKMSHSTGSMAGASLLRVLQVL  
SSLTSTIDDGNPGTEKETEQEEQNIMERLNMAL EPLWQELSQCISMT EV  
QLDHTSATTTVSSVNP GDHALGVTAPSPISP GTQRFLPLIEAFFVLCEK  
IQTPSILHQDQANVTAGEVKESALSLSSKTSVDSQKKIDGSLTFAKFAE  
KHKRL LNSFVRKNPSLLEKSLSMMLKAPRLIDFDNKKAYFRSRIKHQHD  
QHISGPLRISVRRAYMLED SYNQLRMRSIQDLRGR LNVQFQGE EGV DAG  
GLTREWIDFDDLVSRVIFDKGALLFTTVGNDATFQPNPN SVYQNEHLSYKFK  
VGRMVAKALFDGQLLDVYFTRSFYKHILGVKVITYHDIEAVDPDYYKNLK  
WLENDVSDILDITFSMDADEEKHILYEKTEVTDYELKPRGRNIRVTEE  
TKHEYVDLVAGHILTNAIRPQINAFLEGFNELIPRELVSIFNDKELELL  
ISGLPEIDFDDLKANTEYTSYTAGSPVIHWFWEVVKAFSKEDMARFLQF  
VTGTSKVPLEGFKALQGISGPQRLQIHKAYGGPERLPSAHTCFNQLDL P  
EYPSKEQLEERLLAIHEASEGF GFA

>Bra040685

MDLNRKHKVSLRGASSEEMSRDALLAKV SQARELRSYARRANAAAVFIQR  
VWRSYIVRKKAAAFVIQDEWESSLSCHSDTLTKSWVSSRVLRPFLFFIRS  
LCVQH QKIEPRDVQCMQT CFKILLESINSNDQGYNFCSLAVGTFEESRT  
WLCQTRRLVSLCSFLLTECSYSQERIKDVLGVGALLRLILIVLTDPKSW  
KIVSKQNFEDADESAGKMI VPFIGNSKSGYTA VRRYIKSLTKNSDERLL  
ITTSAVTLALRPFHARQPDSDGDNQPD TNLAVEEYVSLILTI PRLVCC L  
PSVLIRALKHKSI LMP SFHTILIRDKLLTRISEIEYSE RQSC TEIPS  
VGWAMGNIVSLATVSENDFMDTQESNLEMFYVLYVHVIVTLTENLLSQV  
EKVGTQDIHLD FEATPDDTEKGKSSVKISFVELLRPVCQQWHLAKLLAA  
SGKETRIIADKDASTNSKKGSETLELFDVARFYSCMLRIFCVLNPVVG P  
LPVLNMLSFPSPGYIVSLWSSLENVLLSE DGCIPDESSHKPAKASWNTRS  
PSEKKLKHVKNDGVNKNVNLNKFSGKSPGPREHVESTSDQPGSS LIND  
STDDGVDVQTLRGGPVGISKDVSCLLHLFCATYAHLLVVLDDIQFYEKQ  
VPFMLEKQRRIASVNLTLVYNGLLRGTGPENRQLMDSAIRCLHLLYERD  
CRHFFCPS TLWLS PGRTSRPPIAFAARTHEVLP TSDVFTSPSMGSVITI  
TPHVFPFEERVHV FREFISMDKASRK MAGEVDAPGARSIEIVVRGHV V  
EDGRQNLNSIGSRLKSSIHVSFVNESGLPEAGLDYGGLSKEFLT DITKA  
AFASEYGLFSQTTTSDRLLVPSPSARYLENGIQMIEFLGRIVGKALYEG  
ILLDYSFSHVFIQKLLGRYSFIDELSGLDPELYRNLMYIKQYEGDLQEL  
CLDFTVTEEF CGKMSI IELKPGGKD ISVTNENKMQYIHAMADYKLN RQI  
VPFSNAFYRGLTDLISPAWLKLFNAHEFNQLLSGGNHDI DVDDLRRNTK  
YTGGSYDSSRTIKIFWEVMKGFEP SERCMLLK FVTSCSRAPLLGFKYLQ  
PTFI IHKVSCDTS LWAAIGGDVERLPSASTCYNTLKLPTYKRASTMRE  
KLLYAITSN TGFELS

>Bo1004417

MDLNRKHKVSLRGASSEEMSRDALLAKV SQARELRSYARRANAAAFIQR  
VWRSYIVRKKAAAFVIQEEWESSLSCNSDTLTKSWVSSRVLRPFLFFIRSL  
CVQH QKIEPRDVQCMHTCFKILLESINSNDQGYHFCSLAVGTFEESKTWA  
CQTRRLVSLCSFLLTECSYSQERIKDVLGVSALLRLILIVLTDPKSWKII  
SKQNFEDAETAGKMIVQFLGSSKSGYRAVRKYIKSLTKNSDERLLITTS  
AVTLALRPFHARQPTFVDDNQPD TNLAVEGYVSLILTVPRLVCCLP SALI  
RALKHKSI LMP SFHTILIRDKLLTRISEIEHSEKQSC TEIP SVGWAMG  
NIISLATVSENDFMDTQESNPEMFYVLYVHVIVTLAENLLSQVEKVGTRD  
IHLDFEATPDDTEKGKSSVKISFVELLRPVCQQWHLAKLLAASGKETRT  
ADKDASTRSKKGSETLELFDIARFYSCMLRIFCVLNPVVGPLPVLNMLS F  
CPGYVVS LWSLESVLLPEDGCTADESSHKPAKASWNTRSASEKKLKLK  
NDGVNKNVNLNKFSGKSPGPREHVESTVDQPGSSQANESTDDGWDVQTL  
RSGVPV ISKDVSCLLHLFCASYAHL LVLDDIQFYEKQIPFTLEKQRRIA  
SVLNTLVYNGLLRGTGPENRQLMDSAIRCLHLLYERDCRHFFCPSALWLS  
PGRTSRPPIAFAARTHEVLP TNDVFTSPSMGSVITITPHVFPFEERVHV F  
REFISMDKASRK MAGEVDAPGARSIEIVVRGHVVEDGRQNLNSIGSRLK  
SSIHVSFVNESGLPEAGLDYGGLSKEFLT DITKA AFATEYGLFSQTTTSD  
RLLVPSPSARYLENGIQMIEFLGRIVGKALYEGILLDYSFSHVFIQKLLG  
RYSFIDELSGLDPELYRNLMYIKQYEGDLQELCLDFTVTEEF CGKMSI IE  
LKPGGKD ISVTIENKMQYIHAMADYKLN RQIVPFSNAFYRGLTDLISPAW  
LKLFNTHEFNQLLSGGNHDI DVDDLRRNTKYTGGSYDSSRTIKIFWEVMK  
GFEP SERCMLLK FVTSCSRAPLLGFKYLQPTFI IHKVSCDTS LWAAIGGQ  
DVERLPSASTCYNTLKLPTYKRASTMREKLLYAITSNAGFELS

>Bo1007120

MNCRGRSPMNYDGQYTPVVTNMDKPTLP PFLKNSRRPLVKS LIEMVKLV  
DPKDSEAF LFSEHVLRLSLNLISKVCRESGDHTVSPS QLILCDVDSIKFED  
GNRENLFTRQTGPSKWKPTIDRVHLNTHSKLLETRLN AKEQQLVKTQI  
LLSDLMEQND EHFARILLDVLHAETKTSTSDQMVISWV LILLRRLI ISSN  
PILEVFLVRDLALLLELLNLPSKELMMLVMHLLVSVLSHAKVEDESSKYS  
LDELKPSDLQNL CIFFRKDSQTFNLVSTLRTHSSACVVA FALSSNNIMD  
VTFTPSFYKHMIGDDITYHDMKTMDELFNEWEKLLQTMVT KESVQKYIE  
EEAEYFMTGAIDDKLLAF LKGFHELIPPKYAAIFNAEELRDAMSGMPTIH  
VEALKQTATYVNYVGDDVVIQWFWEVLESFEHCDKAKFLGFVTGTQRVPS  
DGLELTIVRSGATNRLPAGHTCAKQLDLPRYSTKEQLRDKLLKAIQGC DR  
FCFG

>Bo1009294

MFFSGDPSTRKRVDLGGRSTKEGDARRLLEQTRMERNRR LQQKQHNSAAL  
KIQKFFRGRRSMAIERFKVRRDFCETYGDNCQNVDRHCFEPASSFLPQFL  
FFFKAQSSGD FVMLVETCRLLRQFAHSCGDILSFFSGLDYSTEHN TVDFR  
VKKLAFTCIEA IHQNRERLRDQLLVTPPEEATISTAILMDAMSLLLDPKLP  
WVCKIVSYLQKRNIFKLVREIVTTAKEGRSRSP TMNGSILSLESVLF LVVP

HVGREPPCCCPVVDPRWSFSSMILTIPFIWQLFPNLKVVFANPSLSQHYVH  
QMALCIQKDTHTVLPIDTNTTEFFPGYACLLGNTLEIANVVLSQPECSLDMAI  
DIASVATFLLLETLPPIKSSERESRHSSESSEDDMLIDDVQELVLNRTLEQ  
QITTNADSRFLLQLTNILFHQVSGVTQSYDEDKEALAI GTGSSFLYAAF  
NILPLERIMTVMAYRTELVAVLWNYMKRCHENQKWSSMPSVLAYLPADSP  
GWLLPLVVPFCPVYKHMLTIVDNEEFYERKGKPLSLQDIRLLIIILKQALWQ  
LLWVNPLTQHNSGKSVSNDLSKKNRVDLIQNRVGVVVAELLSQFQDWNRR  
QQFTSSSTDFQADTVREYFITQAIVEGTRASYILMQAPFLIPFTSRVKIFT  
TQLATARQSHGSEEMFAGNRFRIRRDHILDDAYNQMSALSEDDLRGPIRV  
TFVNELGVEEAGIDGGGIFKDFMEKITLAAFDVQYGLFKETADHMLYPNP  
GSGMIHQHLLHFFHFLGSLAKAMFEGILVDIPFATFFVSKLKQKYNLNLN  
DLPSLDPELYRHLIFLKRKYKGDISDLELYFVILNNEYGERTEEELLPGGK  
DMRVTNKNVITFIHLVSNHRLNFQIRQQSSHFLRGFQQLIPREWIDMFNE  
HELQVLIISGSADSLDIDDLRENTNYSGGYNAGHYVIDMFWEVMKSFSTEN  
QKKFLKFVTCGSRGPLLGFKYLEPAFCIQRAGGSVSNEAVDRLPTSATCM  
NLLKLPPYQSKEQLETKLMYAISAEAGFDLS

>Bo1012097

MTLRRSTAADSPISHRSPLAVAGTDNHKRKLDHYAADYGLDLLQMKRHEVDADRI SPAS  
QQKPLTSGENYRSLYTPGECSSSSSSSSSLPSESTRLQLFVRMMSGGKTIVIHADRNDTV  
EHLHHRILQKTQIPVTEQRVYIKGKQLQFEHTL NHYSIEQDSSSLHLVGRMQSTEYPVACQ  
TVDEIMSTISRMRHGENLYGGRTNINDKLVKFFARIPAESNRSAAKYLKIFSNSSVPAAL  
VMLFVSPLEINKACGKSSIKLFLNSCVALPVHQNSCLPVVLEFCRLLRGACPDNKLYAS  
CRNTLGSMMLDLVCKSDEFQFRFLTIGEEIYPCVTELADIIVRELVENTGPSLSEVQKFSS  
FWQPLKRAVTAQLPCLFPVAMPLRNTVM EAEIGKLYQIFRRLMTVMDICMTRIESSLGNR  
GVANTEAMSATWSQYLAVLKI VDSMCELYQGAKEQLASLLNARKVSFSALVLKFAKRGDD  
DHQWIFDYKEATTFESRRHLAMLLFPDVKEDYDEMHEMLIDRSNLFAESFEYISGATPGS  
LHSGLFMEFKNEEATGPGVLRWFYLVCEIIFNPRNALFLRSADDFRRFSPNPASKVDPL  
HLSYFEFTGRVIALALMHKVQVGVLFD RVFFSQLAHPEISLEDIKDTRVMYNSCKQILE  
MDPAFFDSNAGLGLTFELETEELGKRETVELLPEGKSI AVNSENREQYVKLLIKQRF AAS  
ISQHVERFSKGFSDILSDSVPAFFKRIYLED FDMRLGGENPISIDDWKAHTEYNGFRET  
DRQIDWFWKIMKKMTEEERRSVLFFWTSTKFI PVEGFRGLSSKLYIYRLHEANDRLPTSH  
TCFYRLCLPKPYPTMGLMEQRLRFIAQDHVSSSF GKW

>Bo1015296

MENRGQKRMEVDVEELPADKRACNSQDSRSSSSGGSSVQSQSQEAANGASS  
GHETTDADMDTSSSDSPSSHSDGEPEKEEEEEEDTDYGCSDSDDEEGENP  
RHKALQDVQWGRSSEDQQKLSSLVTRLSEEVDP SLQLTGLTELCEVLSFC  
TEDSLSTVMADTLARVLVKLANHESNADIMLLAIRAITLYSDVYPRSVAF  
LVKHETLPALCQRLQAIEYLDVAEQCLQALEKISKDEPVACLNAGAIAKAV  
LSYIDFFSTSLQRVAVSTVVNICKRLSSSESPSPFMDAVPILCNLLLYEDR  
QLVESVAICLTKITDQVSESP EMLDQLCSHGLIHQSIHLLNLNGRTTLSQ  
PVYNGVIGLLRKLSSGSTLAFRTLYELNIGYRLKEIISTYDISHSVSSTN  
PITACSNQECNDSDFNVGDENQFTTQVHEVLKLVIGLLPSPSPVEDNQ LAL  
EKESFLVNQPDLLQQFGADVLPVMIQVLKSGANVYVSYGCLSAIHKLTCL  
SKSADFEVDLLKNANILSVLAGILSRKDDHVVVVALQIAEVLLGKYSEDFL  
NSFVKEGVYFAIEALLNSGQQSQGSTDVSEEPVPKETVKCLCQS FERSIS  
SSSQTKIEKDSVYILATRIKESFFGPEVFDSQKGLTDVLQNLKHL SAAL  
DDLMTVPIDAPALHDEKFFSVWSQIMERLNGRESVSTFEFTESGVVKALA  
NYLSNGLHQKRFKSGDPECDSLPFVGNRFEVFT RSLWSDGEATSSVLIRK  
LQNSLSSLESYPIVLSQFLKQRNSFATVPNGRSTSYPILRVRFVKAEGET  
CLRDYSQDLVTVDPLCFLDAVDQYMWPKVQLEPLDSVEEKDQAMECPSSQ  
LQSTSISQCGESSTHMEIDSPNASQLQGSQEEDQEQLPDSGEENTSSSEE  
EDALPRLFRLEGLELDRSLTVYQAILLHKLKSASET TND SKLSGSH TIT  
YERAPQLAESDENLFFPLGSMNDNEYHPFLSFLFAQRLGLRHKATNP PAYD  
ILFLLKSLBGMNRFHLICHERINAFGEGRLENLDDL RVQVCPVPYAEF  
VSSKLTKELEQQLRDSFAVSTCGLPPWFNDLMGSCPFLLSF EVKTKYFRL  
SAFGSQKVHHHPQHLSSEGRPVTGSLPRKKFLACRENILESASKMMELHG  
NQKVVIEVEYSEEVGTGLGPTLEFYTLVSRAFQNPDLGMWRCDRSSFAGK  
PKEDSGFLVAPSGLFPRPWSDASAAFPDVLQKFVLLGT VVAKALHDGRVL  
DLFPKAFYKLI LGQELSSFDIHFVDPELCKTLVELQALARRKKVFS ESQ  
SDARAACDLSFRGTKIEDLCLEFALPGYS DYDLAPHSSTDMVNLDNLEE  
YIKAIVNATVCTG IQKQVEAFRSGFNQVFP IEHLGIFNEEELETLLCGER  
DLFNMNVEVL DHVKFDHGYTSSSPPVENLEILHEFDK DQQR AFLQFVTGC  
PRLPPGGLASLNP KLTIVRKHGSDSETDLPSVMTCANYLKLPPFSSKVI  
SLSSSFVNPLSFLMLTKAGLRKDLTVLWFCFVFCVLCVQLQEKMKELIY  
AITEGQGSFHLS

>Bo1016067/8

METRSRKRAEATSTAPSSSSSSPPPPPSGPTTRSKRARLSSPSSSSAAAATTATAPSSST

RSRSSRSAAATATATAAVTPMDTSTESSGFRRGGGRGNRGNNDNTNSDKGKEKEHEVRIRDR  
ERDRARQQLNMDAAAAAAAEEDDDNSEDGNGGFMHPNMSSASSALQGLLRKLGAGLDD  
LLPSSGIGSGSSSHLNGRMKKILAGLRSEGEEGKQVEALTQLCEMLSIGTEDSLSTFSVD  
SFVPVLVGLLNHESNPDIMLLAARALTHLCDVLPSSCAAVVHYGAVSCFVARLLTIEYMD  
LAEQSLQALKKISQEHPTACLRAGALMAVLSYLDFFSTGVQRVAVSTAANMCKKLPSDAS  
DYVMEAVPVLTNLLQYHDAKVLEYASICLTRIAEAFASSPDKLDEL CNHGLVTQAATLIS  
ASNSGGGQASLGVSTYTGLIRLLSTCASGSPLGCRTLLLLGISSILKIDILSGSGVSPANAS  
ISPALSRRPADQIFEIVNLANELLPPLPEGSISLPTSANALVKGSGQKNSSPSTSGKQEDS  
PKVSPREKLLCDQPELLQQFGLDLLPVLVQIYGSSVNGTIRHKCLSVIAKLMYFSTPEMI  
QSLIGDTNISSFLASVLAWKDPQVLVPALQVAEILMEKLPETF SKVFVREGVVHAVDQLV  
LVGKPSANASTDQENDCVPGSARSRRYRRRSSNANS DGNQSEELKNSVSASIGATHNSME  
SPTASFMLRETVSSCAKAFKDKHFPSDGGGEFDVGVTDDLLHLKNLCTKL TAGTNDHKVKG  
KGKSKVSGPCLGDFSASKEEYLIGI ISEILGELSKGDGVSTFEFIGSGVVAALLNYFSYG  
YFSKEKISEVDLPKLRQDGLRRFKAFL EIALPSDGNEGKIPMTVLIQKLQDALSSLERF  
PVVLSHPSRSLSGSARLSSGLSALAHPLKLR LCRAPGEKALRDYSSNIVLIDPLASIAAV  
EEFLWPRVQRSESGVKAAPAGNTEPGTLP SGAGVSSPSSSTPASTTRHSSRSRSAIKIG  
DASKKEPVHEKGTSSSKGKVMKPAQPDKGPQTRSSAQRKAVLDKDTLMKFPASGDSSSED  
EEMDISPVDMDALVIEEEDISDDDDDDDEEDVLD DDSLPMCTPDKVHDVKLGDAVDDEGA  
GLAPSGRQMNSALAGSSGTATARGSNST DAGIGNLYGSRGALSFAAAAMAGLGAASGRGI  
RGSRDHLGRTLNRSSDESSKLMFTAGGKQLSRHMTIYQAVQRQLMLDEDDDDRLGGSDFI  
SSDGSRLNDIYTIMYQMPDSQANRLSAGGASSTTPSKSTKSATTNASVEAQSYRASLLDS  
IVQKGLPCDLEKANSTYNVLALLRVLEGLNQLGPRLRAQTISDRFAEGKITSLDDLNTTA  
AKVSHEEFINSKLT PKLARQIQDALALCSGSLPSWCYQLTTACPFLEFPFQTRRQYFYSTA  
FGLSRALNRLQQQQGADGSGSTNEREMRIGRLQRQKVRVSRNRILDSA AKVMEMYSSQKA  
VLEVEYFGEVGTGLGPTLEFYTLLSHDLQKVSLGMWRSNSGDKLSMQTDRDEIQDGKSAA  
ARDRDIVQAPLGLFPRPW PSTADVSEGSRFHKVVEYFRLLGRVMAKALQDGR LMDVPLST  
AFYKLILGQELDLHDV IIFDTELGKTLQELRVLVGRKHYLEAEGGDNSSVISDLCLRGSR  
IEDLCLDFTLPGYPEYILRPGDDIVDINSLEDYISLVVDATVKRGVARQIEAFRSGFNQV  
FDIKSLQVFTPSELDYLLCGRRELWEAETLVEHIKFDHGYTAKSPAIIFLLEIMGELTAD  
QQRAFCQFVTGAPRLPPGGLAVLNPKLTI VRKLSSTSNAANGTGASETADDDLPSVMTC  
ANYLKLPPYSTKEIMYKKLLYAINEGQGSFDLS

>Bo1030543

MTLSRYSDNHKKRKFDDNGVDNNILHKMKRHEVDADHTSPSQQPFNPWRSD  
ENSPQNRYECCSSSSSSSSSSSSSTESSTRSESTRLQLFVRMVSGGKTIVI  
QADKSDTVENLHQRIELKTKIPVNGGKTIVI QADKSDTAENLHQRIELKT  
KTPVNMKQVVIYKQQLQDERPLSYYSIPQDSSLHLVGRMRSTDHPVACRV  
VDDIMYIVSRMRHGGGGGNNNLPRGMSINEKLSFFSAIPRESGGDDNS  
YIDSTDXYLTI FTNSSVPASLVMLYTSPLKANKSCGESSIKLFLNSCLAL  
PDEQQSCCLPVVLEFCRLLRVC PHSSLYGSCRNTLGS LLETVQELVDKS  
GTEVTS LH YRLLTVGEEILPCLSELADLMEQQLYDDNLGPSLYDVQKFSS  
FWRPLRYAIDFQLSS LIPFALPLRSTVLEAEVARICQIFGRLLTTMHICI  
LRIESSLGGRGVANTEAMPLKWGQYLNILKIVSSMSELYQGGKEKVVSLI  
NSRKVPFCALILKFVKRGDDHGWISEYREATT FECRRHLAMMLFPDGKED  
YSEMHEMLIDRSQVLKESYEYISQASPGGLHGALFMEFKNEEATGPGVLR  
EWFYLVQC EIFSPGGTLFLRSPDDFRFRFSPNPASKVEQLHLGYFKFAGRV  
IALALMHKVQVGVLF'DRVFYLQLTNQITISLEDIKDTRVINYNSCKQILEM  
DPVFSDSNAGLGLNFVLETEELGKRETKELIKDGKSTAVDSKNREYVKL  
LISERFVTSVSELVEKFSEGFSDILSVPIQSFFRHL DLEDFDGM LRGGEN  
QISVDDWKAHTEYNGFKETDRQIDWFWKILRKMTEEERRSVLFFWTSNKF  
IPLLEGFRGLSSKLYIYIRLHEANDRLPTSHTCFYRLCLPKYPTMGLMEQRL  
RFITQDHSVSSSFGKW

>Bo1036879

MFFSGDPSTRKRVDLGG RSTKERDARKLLEQTRMERNRRL LQKQONAAAL  
KIQKFFRGRRSVATERSKVRREFCETYGDNCQNVDRHCFEPGSSFLRQFL  
FFFKAKNSGDFLILVETCRL LKMF AHSNGDILSLFSGSDYSAEHNLVDFR  
VKELAF TCIEA I HQNRDLRDQLLVTT EEASTSTAILMEAMSLVDPKLP  
WVCKTVSYLQKRHIFKLVREIVITAKENPRGQTKTGNILSLERVLILVVS  
HVGREPCCCPVDDPRWSFSSMILTPLIWLQLFPNLKVVFANPNLSQH YIH  
QMAFCIQKDTHVLPIDTST EFPGYACLLGNTLETANVVL SQPDCSLDMAV

DIASVATFLEKLPVVKSSERESKQSSSEEDDMLIDDIPELVLNKTLEQQ  
ITSNADISRFLQLTNNVLFHQVSLGTQPYDEDKEAQAIGTASSFLYAAN  
TLPLERIMTVLAYRTELVVVLWNYMKRCHENQKWSSMPNLLAYLPGDAPG  
WLLPLVVFPCPVYKHMLMIVDNEEFYEREKPLSLQDIRLLIIILKQALWQL  
LWVNPLTQPSTGKSVSNNLSKKNPVGLIQNRVGVVVAELLSQLQDWNNRQ  
QFTSSSDQADTVNEYFISQAIAEGTRANYILMHAPFLIPFTSRVKIFTT  
QLATARESHGHGSQAIFARNRFRIRRDHILEDAYNQMSALSSEDDLGRSIR  
VTFVNELGVEEAGIDGGGIFKDFMEKITRAAFDVQYGLFKETVDHMLYPN  
PGSGMVHDQHLQFFHFLGTLLAKAMFEGILVDIPFATFFLSKLKHKYNYL  
NDLPSLDPELYKHLIFLKRYKGNIAELELYFVILNNEYGERTEEELLQGG  
KDMRVTNENVITFIHLVSNHRLNFQIRQSSSHFLRGFQQILPKECIDMFN  
EHELQVLISGSADYLDIDDLRQNTNYTGGYNAGHYVIDMFWEVLKSFSTE  
NQKKFLKFVTGCSRGPLLGFKYLEPAFCIQRAAGSASNEAVDRLPTSATC  
MNLKLPYQSKEQLETKLMYAI SAEAGFDLS

>Bo1003946

MTRRLTSSLSHRSSSDNPKRKLDENGVENLLLPKMKRHEVSAESSSGSESTRLQIFVRM  
MSGGKTTVIHADKNDTVEQLHHRIELKTKIPAKEQRVIYKKGQLQLEHSLSYYSIEQDSS  
LHLLGRMQSTEHPVAWRVTDDIMYAVSRMLRGDWFVSVNNINDILVTFFDTMPKKATCEY  
LEIFLNSSVPAALVMLFASPLETNKSCAKSSIKLFFDSCIDLDPHEQRCFLPVVLEFFRL  
LRKVCPRNKLYVSCRNTLGSVLESVYSSGESRSCLLSIGDEIFPCVRELAKIMVKQLVDD  
DDSGRPSSCDVQKVSSFWLPLRYSIQNQAETFTLIAFPLQNNVHGKLYHIFEKLLNAMG  
EGMSRLESILARRGAWSAKCSHYLAAILKIVSSMSELYQGCKERVALLSRKASFGALVL  
KFAKRGDDDDHQWIFEYKEATTESRRHLAMLFFPDVEEEEDYEEHMEMLIDRSNLLAE  
SFEYITEASSEELHGRLFMEFKNEEATGPGVLREWFYLLCQEIFNPQNTLFTRSADDSRR  
FSPNPASEVDPLHLDYFEFTGRVIALALMHKVQVGVLFDREVFFLQLTGKKIGLEDIKNTD  
RIMYNSCKQILEMDPECFDS DAGLGLTFVSETEVLGKRETKELLKDGKSI AVNSKNREQY  
VNLLIKHRFATSVSEQVNQFSQGFSDILADTACFFERLYVEDDFCMLGGGDNLISIDDWK  
AHTEYNRFFKTDRLIGWFWKILKMKTEGERRSVLFFWTSTRFIPVEGFRGLSSKLYIYRI  
HEAKDHLPTSHTCFYRLCLPKYPKIGLMEKRLRLIAQDHSVSSSFGQW

>Bo1000770

MENRGQKRMEVLGEPPADKRACNSQDFTSGASSVQAQQANGNTDADMDTS  
SSASPSSRSQGEQDREEKEEEDYGSCDSDDADPRRRVLQRYQGRSTGDQ  
LKLKSLVTRLSEENDPSLQLTGLTELCEVLSFCTEDSLSSVMADLLSRVL  
VKLAKHESNADIMLLAIRGITYLCDVYPRSVAFVLKHETVPALCQRLTLTI  
EYLDVAEQCLQALEKISRDPVACLNAGAIMAVLSYIDFFSTSIQRVAVS  
TVVNICRKLPEPPSPVMDAVPVLNLLQYEDRQLVESVAICLTKIADQV  
SQSPTMLDQLCSHGLIHQSTHLLNLSRTTSLQPVYNGVIGLLRKLSSGS  
TLAFRTLYELNIGYRLKEIISTYDISHSVSSTQPLNACSNQVHEVLKLVI  
ELLPASVPEENHLALEKESFLVDQPNLLQQFGADMLPVMTQVLKSGASVY  
VSYGCLSAIHKLCLSKSGDLVELLNNANISSVLAGILSRKDDHHVVVVAL  
QIAEVLLEKYRDAFLNSFIKEGVFFAIAALLTADRQQQINPVSGFIQGSV  
PKEIVKCLCQSFEGSVSSSSQTCVKGNDSVYILATRIKESFFGPEVFDSQ  
KGLTDVQLNLKNSAELNDLVTPVDTHVLHGERFFSIWNQIMERLNERE  
SVSTFEFTESGVVKAANYLSNGLYERKLSKGGPECDLSPLVGNRFEVFT  
RLWSDGEATKSVLIQKLQNSLSLENYPIVLSQLLKQRNCYAAVPNGRC  
ISYPVLRVRFAKAEGETCLRDYSPNFVTVDPLCYLDAVGQCCLWPQVNLKP  
LNSVEAKDQAI ECQSSQLQSTSI SCQGESSSHMEIDSPNASQLQGSQEEE  
DQDHLIDSGEENSSSKEEDVRPRLFRLEGLELDPSLTVYQAILSHKLK  
SENETTNDKLSGHHTITYERAPQLAVSRENLFPLGSDNDEHHFPFLSYL  
FAHRLGLRHRVTSPPAYAILFLLKSLEGMNRFHLICHERINAFGEGR  
ESLDDL SVQVRPVYAEFVSSKLT EKLQQLRDSFAVSTCGLPPWFNDLM  
YSCPFLFSFEVKSKEYFRLAAFGPQQVHNQPQHLGSSNVHGEGRSVTVSLP  
RKKFLACREKILESAAKMMLHGTQKVSVEVEYSEEVGTGLGPTLEFYTL  
VSRAFQNPDLGMWRSDPSSLAGKPMVPPSGLFPRPWSATSAAFPGLVQKF  
VLLGTVVAKALQDGRVLDIPFSKTFYKILGQELSSFDIHFVDPELCKTL  
VELQALARRRKVISESQSDVRAAKSDLSFRGTKIEDLCLEFALPGYTDYV  
LSPQFANDMNVNGLNLEEYVKAIVNATVCNGIQTQVAAFRSGFNKVPPIEH  
LKIFNEELETLLCGERDLFSMNEVL DHIKFDHGYTSSSPPVQNLLEILH  
EFDKEQQRAFLQFVTGCPRLPPGGLASLSPKLTIVRKHGSDSSETDLPSV  
MTCANYLKLPPYSSKEKMKELIYAITEGQGSFHL S

>Bo1003376

MATGRSASMP SRLQLLSGEGSIGPSIRLDAEPPPEIKSFIEKVIQSPLS  
DIATPLSGFRWEYSKGNFHHWRPLFLHFDKYFKTFISTRNDLLSDHILE  
DADPF PKYSVLQILRVMQIILENCPNKSSFDGLEHFKLLLASTDPEVLIA  
ALETLSALVKISSSKLHRSGLKIGCGSVNSFLLSIAQGWGSKKEGLGLYS  
CVVANERNQEEGLSIFPSDLENNHKEADFRIGSTVYFELRGHSAQRIDDG  
SSSATSSSSSSSRVIQIPDLHLRKEDDLVLMKECIEHYNVPPELRFSLL  
TRVRYAHAFRRSRI CRYSRICLLAFIVLVQSSDAQEELASFFANEPEYT  
NELIRIVRSEEP IPGTIRTLAMLALGAQLAVYSASHDRARILSRSSISFA  
VGNRMILLNVLQKAVLSLSKISSDPSSIAFVEALLQFYLLHIVSSSSSGST

IRGSGMVPFTFLPLEYTDPSHLHLVYLAVKALQKLM DYSSSAVPLLRDLG  
GVELLSQRLELEVHHILKLTGENNSDMVVGESLELNGDQLLSRKRLIKVL  
LKSLSGSSTYTPGNANRSQSSQESTLPATLSLIYRNADKFGGDIYSAVTV  
MSDLIHKDGTSLTSLFEMGLPEAFLLSSVSGVLPSSKA IACIPNGLGAIS  
LNSKGLETVKETSALRFLVDVFTSKKYVLAMNEAIVPFTNAVEELLRHVS  
SLRATGVETIIIEIVDNIACFGESGSSSSSVSTAMEMDSVDKNINGVSHEQ  
FVQLCIFIHLIILLHRTMENAETSRLFVEKSGIEALLKLLLRPSIAQSSEG  
VSIALHSTIVFKGFTQHHSASLARAFCSRLRDQVKKALGGLQDLSGTFLL  
DRKLSPPSCGIFSSFLVEFLLFLAASKDNRWMTALLSEFANGSKDVLENI  
GHLHREILWHIAVYESGTLES PNTSPESQTEPSSNGTEGQRFSSFRQFL  
DPLFQRRTSGWSAESQFFDLTNLYRDLGRASTGFQPRPISDGPSSSSSEAS  
GNRELERE GSYTSCCDMVKSLSFHITYIFQELGKAMLLQFRRREDTVNV  
SPSSKLVASSFASISLDHLNFEGHEIAAEASRSTKCLYLKGVVDFIDAVL  
LDRPDS CNPVLINCFYGRGVIQT VLTTFDATSQ L LFSINRSYSSPMETDD  
VKGKGDEKEDTDHAWIYGPLAGYKGLMDHLVTSSFILSPFTKRLLVQPVE  
NGNIPFPQDPQTFVKILQSI VLKAVLPVWTHPLFTECSYDFVTALISIIK  
HVYSGVELKSLGGSGSARVTGPPPSETTISTIVEMGFSRSRAEEALRQVG  
SNSVEFAMEWLF SHPEEI QEDDELSRALAMSLGNS ESDTKENNVDETREQ  
IEAEIVSLPPVEELIATCTKLLQMKEPLAFFVRD L LVLICSENNGEHRSG  
GICCLLSRILKDCCPVFD DTKNNLLSALLHVLALILHEDAGSREVALKAGT  
VRLVCDVLSKWDSGSIDKEKFNVPKWVTTGFLAIDRLLQVDQKLNTELIE  
ELQKGETSLAIDESKQDKLQSVFGSSQLVDADDQKKLIEI ACTCIRNQLP  
SETMHA V LQLCSTLTRKHSVAVCF LDFGGVQGLLSLPSNSLFPFGFDSVAA  
SIIRHLEDPQTLQQVMESEIKHALATLSNRHSNQRI SPRNFLLHVNSVI  
ARDPVTFIQAARSICQVEMVGERPYIVLVKEKEKSKDKEKDKDKKDRAD  
KEKSQTSNEVATTPPGSTKAKVYRKPPQSF IG VVELLLDSL CNFVPPPK  
DDMVEGDSADMDIDHASTKGKGKAVATTP E EKKAISQDMSASLAKIVF  
ILKLLSEMLLMYSSSIHILRRDAEIKSLRGPQQKGGQVGGIFHHILHKE  
IPYSRVKKEKKSESDWRQKLASRANQFLVGASVRS AEARKRIFSDISSIF  
NDFITGTSNGLRPPANEIHILIDLLSDMLSARSPTGSHISSEASNTFVDVG  
LVKSLTRTLEVL DLDNVESPKTVTGIIKVL ELVTKEHAHSADSN SKNENA  
NKSSDQIQSGRGDTTADASEAGGILLRSNHDSMTADHAENFGGSHTFVGS  
EDVTDDMEHDQDLDEGFAAGGDDYMQEA AEDARGLENGIGSMGIEFEMHT  
HVQENLDEDEDEDEDED R VILRFEDGFNGLNVLDHLEVLRDHRFSDETL  
HVMPEVFGSRRQGR TTSIY SLLGRTGDGATPSQHPLLSGSPSLPASQSQ  
TESTHDHTVIGGRDSNGSSSR L DAI FRS LRNGRQGHRLNLWADDSQQIVG  
SGASTVPQGLEDDLVSQ LRRPGSDNPSDDQNPSPLEPQSQAESGQFQEAT  
VRPEIPDENATDNGGANVSAPSIVSPVASATPDTRAPATDSVSSRSQS V  
EMQYDPNDSTVRDVEAVSQESGGSGATLGESLRSLDVEITGSADGHDDGGE  
RHDVQPAIRSRANLSLLPSSTGREASLYSVTEVPENSGHEAEQDNPP EE  
QPVNRNVASSSIDPAFLDALPEGLRAEVL SAQQGQAPEPSSNEQQNSGDI  
DPEFLAALPADIRAEVLAQQQAQRVHQSHLEGQPVEMD TVSIIATFPSE  
LREEVLLTSDDAVLANLTPALVAEANMLRERFAHRYHNRALFGMHPRHRR  
GEASRRGEGVISGNEG IASRRSAKVIEAAGAPLVNTEALQAMIRVLRIV  
QPLYKGPLQRLLLNLCSHGETRFSLVNTFMDMLMLDTRKPVNYSSVSEPP  
YRLYACQSNVTYSRPFQHF DGVPPLVSRRVLETLTYLARNHIYVAKILLQS  
RLSLPSLQGSVPSPDKARGKAVVVSDDHMSRTQQEPESVAFALLSLLNQ P  
LYLRSVAHLEQLLNLLEVIIDNAERKSEADGSDGSASEQQSTHQALEVE  
NNSENHDMVSGTVPAGTVTKPIVSSGSSSNRAESECDVHTVLLNLPQSEL  
CLLCSLLAREGLSDNAYTLVAEVLKKLVAMAPSHCHL FITELANAIQSLT  
RSAISELHMFGEAVKTLTSTSSDGSGVLRVLQALSSLVDSLLITKEKNS  
EEHVAVFSQLSNINLALEPLWLELSNCICKIEGHSDSASVTTTSPTTSTS  
SATTRGAGVSQSLPAGAQNMLPYVESFFVTCEKLHPSSQSCDISVPMASS  
DAEEQPKGPGPSSSSKVDEKYG SFIKFSE RHRKLLNAFIRQNPALLEKSF  
SLMLKVPRFIEFDNKRAYFRSKIKHQHDHHSPLRISVRRAYILED SYNQ  
LRMRSTQELKGR LTVHFQGE EGIDAGGLTREWYQLLSRVIFDKGALLFTT  
VGNDSTFQPNPN SVYQTEHLSYFKFVGRVVGKALFDGQLLDVHFTRSFYK  
HILGVKVTYHDIEAIDPDYKALKWMLENDISDVLDLTF SVDADEEKLIL  
YEKTEVTDHELIPGGRNIKVTEENKHEYVDLIAEHRLTTAIRPQINAFLE  
GFSELILKDLISIFNDKELELLISGLPDIDL DNL RANTEYSGYSPGSPVI  
QWFWEVVQGLSKEDKARLLQFVTGT SKVPLEGFSSLQGISGAQKFQIHKA  
YGSANHLPSAHTCFNQLDLPEYPSKEHLQERLLLA IHEASEGFGFG

>Bo1000411\*

QPAIRSRANLSLVPSSTGREASLYSVTEVPENSGHEAEQDNPP EEQPVNRDVASSIDF  
AFLDALPEGLRAEVL SAQQGQAPEPSSNEQQNSGDI DPEFLAALPADIRAEVLAQQQAQR  
VHQSHLEGQPVEMD TVSIIATFPSELREEVLLTSDDAVLANLTPALVAEANMLRERFAH  
RYHNRALFGMHPRHRRGEASRRGEGVISGNEG IASRRSAKVIEAAGAPLVNTEALQAMI  
RVLRIVQPLYKGPLQRLLLNLCSHGETRFSLVNTFMDMLMLDTRKPVNYSSVSEPPYRLY  
ACQSNVTYSRPFQHF DGVPPLVSRRVLETLTYLARNHIYVAKILLQSRLSLPSLQGSVPSPD  
KARGKAVVVSDDHMSRTQQEPESVAFALLSLLNQ PLYLRSVAHLEQLLNLLEVIIDNAE  
RKSEADGSDGSASEQQSTHQALEVENNSENHDMVSGTVPAGTVTKPIVSSGSSSNRAES  
ECDVHTVLLNLPQSELCLLCSLLAREGLSDNAYTLVAEVLKKLVAMAPSHCHL FITELAN  
AIQSLTRSAISELHMFGEAVKTLTSTSSDGSGVLRVLQALSSLVDSLLITKEKNSEHV  
AVFSQLSNINLALEPLWLELSNCICKIEGHSDSASVTTTSPTTSTS SATTRGAGVSQSLP  
AGAQNMLPYVESFFVTCEKLHPSSQSCDISVPMASSDAEEQPKGPGPSSSSKVDEKYG SF  
IKFSE RHRKLLNAFIRQNPALLEKSFSLMLKVPRFIEFDNKRAYFRSKIKHQHDHHSPL  
RISVRRAYILED SYNQLRMRSTQELKGR LTVHFQGE EGIDAGGLTREWYQLLSRVIFDKG  
ALLFTTVGNDSTFQPNPN SVYQTEHLSYFKFVGRVVGKALFDGQLLDVHFTRSFYKHILG  
VKVTYHDIEAIDPDYKALKWMLENDISDVLDLTF SVDADEEKLILYEKTEVTDHELIPG  
GRNIKVTEENKHEYVDLIAEHRLTTAIRPQINAFLEGFSELILKDLISIFNDKELELLIS  
GLPDIDL DNL RANTEYSGYSPGSPVIQWFWEVVQGLSKEDKARLLQFVTGT SKVPLEGFS

SLQGISGAQKFQIHKAYGSANHLPSAHTCFNQDLPEYPSKEHLQERLLLAIEHASEGFGFG

>Bo1000412\*

QPAIRSRRLANLSLLPSSTGREASLYSVTEVPENSGHEAEQDNPPEEQPVNRDVASRSIDF  
AFLDALPEGLRAEVLSAQQGQAPEPSSNEQQNSGDIIDPEFLAALPADIRAEVLAQQQAQR  
VHQSHLELEGQPVEMD TVSIIATFPSELREEVLLTSDDAVLANLTPALVAEANMLRERFAH  
RYHNRALFGMHPRHRRGEASRRGEGVISGNEGIASRRSAKVIEAAGAPLVNTEALQAMI  
RVLRIVQPLYKGPLQRLLLNLCSHGGETRFSLVNTFMDMLMLDTRKPVNYSSVSEPPYRLY  
ACQNSVTVYSRPPQHFDGVPPLVSRRVLETLTYLARNHIYVAKILLQSRSLSPSLQGSVP  
KARGKAVVVSDDHMSRTQQEPESVAFALLSLLNQPLYLRSVAHLEQLLNLLLEVIIDNAE  
RKSESADGSDGSASEQQSTHQALEVENNSENHDMVSGTVPAGTVTKPIVSSGSSSNRAES  
ECDVHTVLLNLPQSELCLLCSLLAREGLSDNAYTLVAEVLKKLVAIAPSHCHLFFITELAN  
AIQSLTRSAISELHMFGEAVKTLTSTSSDGSGLRVLQALSSLVDSLLITKEKNSEEHV  
AVFSQLSNINLALEPLWLLELSNICKIEGHSDSASVTTTSTSTSSATTRGAGVSQSLP  
AGAQNMLPYVESFFVTCEKLHPSSQSCDISVPMASSDAEQPKGPGPSSSSKVVDEKYGSF  
IKFSEHRKLLNAFIRQNPALLEKSFSMLMKVPRFIEFDNKRAYFRSKIKHQHDDHHSP  
RISVRRAYILEDNSYNQLRMRSTQELKGRITVHFQGEEGIDAGGLTREWYQLLSRVIFDKG  
ALLFTTVGNDSTFQPNPNPVSQYQTEHLSYFKFVGRVVGKALFDGQLLDVHFTRSFYKHILG  
VKVTYHDI EAIDPYYKALKWMLENDISDVLDLTFSDVDADEEKLILYEKTEVTDHELIPG  
GRNIKVTEENKHEYVDLIAEHRLTTAIRPQINAFLEGFSEILKDLISIFNDKELELLIS  
GLPDIIDLNLIRANTEYSGYSPGSPVQWFEWVQGLSKEDKARLLQFVTGTSKWETDVLN  
STTQGTSGRI

>AT4G12570/UPL5

MTLSRSSADDSTNNANRSYSAVAGTDNKRKRDESSDYVGVAESLEMLKK  
QEIDADHMAASAQQTLISWRSGENSRSLSSSGECSSSNRPESTRLQIFVR  
MMSGGKTIIVIAEKYDTEVEKLHQRIEWKTKIPALEQRVIYKKGQLQRENS  
LTYYSIEQDASLQLVARMQSTHEPVAWQTIDDIMYTIISRMKGENLQSN  
NEKIVTFFAMIPVESDESIKAYLNI FSNSSVPAALVMLYASSLERNKSCA  
KSSVKLFNLKNKVSFSA LVVKFAKRGDH QWIF EYKEATNFEARRHLAMLLF  
PDKVEDFEEHMEMLIDRNLSESF EYIVGASPEALHGGLFMEFKNEEAT  
GPGVLRWFYLVLCQEIFNPKNTLFLRSADDFRRFSPNPASKVDPDLHPDFF  
EFTGRVIALALMHKVVQGVLFDRVFFLQLAGLKSILEDIKDTRIMYN  
KQILEMDPEFFDSNAGLGLTFVLETEELGKRDTIELCPDGKLLKAVNSKNR  
KQYVDLLIERRFATPILQVQKQFSRGFTDMLSHSVPPRSFFKRLYLEDLD  
GMLRGGENPISIDDWKAHTEYNGFKETDRQIDWFWKILKMTTEEQRSIL  
FFWTSNKFVPVEGFRGLSSKLYIYRLYEANDRLPLSHTCFYRLCIPRYPT  
ITLMEQRLRLIAQDHVSSSFGKW

>AT5G02880/UPL4

MENRGQKRMEVVEELPADKRACNSQDFRPSTSGSSVQAQANDTNPGHENV  
DADMDTSSASPSRSRDEEEQDEQKEDSDYGS CDSDEEDPRQRVLQDYQ  
RQRSSGDHGLKSLLLNLTGETDPGQLSRLTELCEVLSFSTEESLSSVM  
ANMLSPVLVKLAKHENNADIMLLAIRAITYLCDVYPPSVEFLVRHDTIPA  
LCQRLLTIEYLDVAEQCLQALEKISRDEPVACLNAGAIMAVLSFIDFFST  
SIQRVAISTVVNICKQLSSESPSPFMDAVPILCTLLQYEDRQLVENVAIC  
LTKIADQASESPAMLDQLCRHGLINETHLLNLSRRTLSQPVYNGVIGM  
LRKLSSGSALAFRTLYELNIGYSLKEIMSTYDISHSVSSTHPINACSNQV  
HEVLKLVIELLPASPVEDNQLASEKESFLVNQPDLLQQFGRDMLPVMIQV  
LNSGANVYVSYGCLSAIHKLTCLSKSGDIVELLKNTNMSSVLAGILSRKD  
HHVIVVALQVAEVLLEKYRDTFLNSFIKEGVFFAIEALLSSDRGQQNQGS  
ADLSQKPVTKIIVKCLCQSFERSLSSSSQTCIEKDSVYVLATRIKEGFF  
GPEVFNSEKGLTDVLQNLKNLSVALSELMTVPIDAHVLHDEKFFSIWNQI  
MERLNGRESVSTFEFIESGVVKS LASYLSNGLYQRKLSKGGPECDSLPFI  
GKRFEVFTRLWSDGEATSSLLIQKLQNSLSLLENFPIVLSQFLKQKNSF  
AAIPNGRCTSYPCLKVRFLKAEGETSLRDYSQDFVTVDPLCYLDAVDQYL  
WPKVNIEPIDSV EAKDQAIECQSSQLQSTSISCQAESSSPMEIDSESSDA  
SQLQGSQVEDQTQLPGQQNASSSETSSEKEDAVPRLFLRLEGLELDRSLT  
VYQAILLHKLSESEATNDSKLSGPHNITYERSAQLGDSRENLFPPGSME  
DDEYRPFLLSYLFTHRLALRLKGSSHPPYDILFLLKSLEGMNRFLFHLISL  
ERINAFGEGRLENLDDLVRVQVRPVP HSEFVSSKLTEKLEQQLRDSFAVST  
CGLPPWFNDLMDSCPCLFSFEAKSKYFRLLA AFGSQKIRHHPQHLSSSNVH  
GEARPVGTSLPRKKFLACRENILESAAKMMELYGNQKV VIEVEYSEEVGT  
GLGPTLEFYTLVSRAFNPNDLGMWRNDCSFIVGKPV EHSGLVASSSGLFP  
RPWSGTSTTSDVLQKFVLLGT VVAKALQDGRVLDLPLSKAFYKILGQEL  
SSFDIHFVDPELCKTLVELQALVRRKKLFAEAHGDSGAACDLSFHGTKI  
EDLCLEFALPGYTDYDLAPYSANDMVNLDNLEEYIKGIVNATVCNGIQKQ  
VEAFRSFGNQVFSIEHLRIFNEEELETMLCGECDLFSMNEVL DHIKFDHG  
YTSSSPPEYELLQILHEFDREQQRAFLQFVTGSPRLPHGGLASLSPKLT  
VRKHGSDSDTDLPVMTCAN YLKLPPYSSKEKMKELIYAITEGQGSFH  
LS

>AT4G38600/UPL3

METR SRKRAEATSAAPSSSSSSPPPPPSASGPTTRSKRARLSSSSSSSLA  
PTPPSSSTTTRSRSSRSAAAAAPMDTSTDSSGFRRGGRGNRGNNDNSDK  
GKEKEHDVRI RERERERDRAREQLNM DAAAAAARSAD EDDDNDS EGDNGG  
FMHPNMSASSALQGLLRKLGAGLDDLPSGGIGSASSSHLNGRMKKILS  
GLRAEGEKGQVEALTQLCEMLSIGTEDSLSTFSVDSFVPVLVGLLNHES  
NPDIMLLAARALTHLCDVLPSSCAAVVHYGAVSCLVARLLTIEYMDLAEQ  
SLQALKKISQEHPTACLRAGALMAVLSYLDFFSTGVRVALSTANMCKK  
LPDSADYVMEAVPLLTNL LQYHDSKVLEYASICLTRIAEAFAPYPEKLD

ELCNHGLVTTQAASLISTSNSGGGQASLSVSTYTGILIRLLSTCASGSPGLF  
RTLLLLLGISSILKIDILLGSGVSNANASVSPALSRPADQIYEIVNLANELLF  
PLPEGVISLPTSTNALVKGSCQKKSSPSTSGKQEDILKISPREKLLGDQP  
ELLQQFGLDLLPVLVQIYGSSVNGTIRHKCLSVIGKLMYFSSSEMIQSLI  
GDTNISSFLAGVLAWKDPQVLVPALQVAEILMEKLPETF SKVFVREGVVH  
AVDQLVLVKGKPSHASPTDKDNDCVPGSARSRRYRRRSSNANSNGNQSEEP  
KNPASLTIGANHNSLDTPTASFMLRETVSSCAKAFKDKYFSDGGDVDVG  
VTDDLHLKLNLCFKLTAGIDDDHKVKGKGSKASGPFGLGDFSASKEEYLI  
VISEILGEISKGDGVSTFEFIGSGVVAALLNYFSCGYFSKEKISELNLPK  
LRQEGRLRRFKAFLEVALPFDGNEGKVPMTVLIQKLQNALSSLERFPVVL  
SHPSRSLSGSARLSSGLSALAHPLKLRLCRASGEKTLRDYSSNIVLIDPL  
ASLAAVEEFLWPRVQRSESAKPAAPIGNTEPGTLPAGVSSPSSSTPA  
STTRHSSRSRSAINIGDTSKKDPVHEKGTSSSKGKGKGMKPAQADKGP  
QTRSNQKRAVLDKDTQMKPASGDSSEDEELEISPVDDALVIEEDDI  
SDDEDDDDNEDVLDDSLPMCTPDKVHVDVKLADSVDDGLATSGRQMNPA  
SGTSGAAARASDSIDTIGNSYSGRGALSFAAAAMAGLGAASGRGIRGSR  
DLHGRTLNRSSDEPSKLIFTAAGKQLSRHLTIYQAVQRQLMLDEDDDRF  
GGSDLVSSDGSRFNDIYTIMYQRPDSQVNRLSVGGASSTPSKSTKSATT  
NSSVESQSHRASLLDSILQGELPCDLEKSNSTYNVLALLRVLEGLNQLCP  
RLRAQTLSDRFAEGKITSLDDLTAAKVPLDEFVNSKLT PKLARQIQDA  
LALCSGSLPSWCYQLTRACPFLFPFQTRRQYFYSTAFGLSRALNRLQQQ  
GADGSGSTNEREMRIGRLQRQKVRVSRNRILDSAAKVMEMYSSQKAVLE  
EYFGEVGTGLGPTLEFYTLSSHDLQKASLGMWRSSSGDKVSMQIGRDEIE  
DGKPSAANRDIVLAPLGLFPRPWPSTADISEGQFHKVIEYFRLLGRVMA  
KALQDGRLLDVPLSTAFYKLILGQELDLHDIVLFDALGKTLQELRVVVA  
RKHYLEGVGGDNSTISDLCLRGCRIEDLSLEFTLPGYPEYILRSGDEIV  
DITNLEEYISLVVDATVKRGVTRQIEAFRSGFNQVFDITSLQIFTPSELD  
YLLCGSARELVEVETLAEHKFDHGYNAKSPAINLLEIMGELTADQQRAF  
CQFVTGAPRLPPGGGLAVLNPKLTIVRKHSSTSSAAANGAGASETADDDLP  
SVMTCANYLKLPPYSTKEIMYKKLLYAINEGQGSFDLS  
>AT3G17205/UPL6  
MFFSGDPSTRKRVDLGGSTKERDARKLLEQTRMERNRRLQKQNSAAL  
KIQKFFRGRSMAIERSKVRHDFCETYGNNCQNVDRHCFEPGSSFLRQFL  
FFFKAQNSGDFVILVETCRLQSFVDSSGDIVSLFSGLDYSSEHNLVDFR  
VKKLAFTCIEAIIHQNRNRLRDQLLVTPPEASISTAILMEAVSLLDPKLP  
WVKCIVSYLQKRKVKLVREMTTAKESPRGKMTGNILSLERVLLIIVP  
HIGREPCCTVVDPRWSFSSMILTIPLIWKLFPNLKVVFANPSLSQHYIH  
QMASC IQKDTCVLPMETSEFFPGYACLLGNTLDTANVVLSQLPECSLDMAI  
DIALVATFFLETLPVKSSEGESRQGSSEDDMLIDDPGLVLNKALEQQ  
ITNAIDSRLLQLTNVLFQVSLGMQSYDEDKEALAIGTASSFLYAAFNT  
LPLERIMTILAYTELVAVLWNMYMKRCHENQKWSSMPKLLAYLPDAPGW  
LLPLVVFPCPVYKMLMIVDNEEFYEREKPLSLQDIRLLIIILKQALWQLL  
WVNPLTQPNTGKSVSNDLSKKNPIELIQNRMGIVVSELLSQLQDWNRRKQ  
FTSSDFQADSVNEYFISQAIMEGTRANYILMQAPFLIPTSRVKIFTTQ  
LATARQSHGSGQIFARNRFRIRRDHILEDAYNQMSALSSEDDLRSIRVTF  
VNELGVVEAGIDGGGIFKDFMEKITRAAFDVQYGLFKETADHMLYPNPGS  
GMIHEQHQLQFFHFLGSLAKAMFEGILVDIPFATFFLSKLKQKYNLNDL  
PSLDPPELYRHLIFLKRYKGDIDSELELYFVILNNEYGERTEEBELLPGGQDM  
RVTNENVITTFIHLVSNHRLNFQIRQQSSHFLRGFQQLPIKEWIDMFNEHE  
LQVLISGSVDSLIDDLRNNTNYAGGYHAGHYVIDMFWEVMKSFSTENQK  
KFLKFVTGCSRGPILLGFKYLEPAFCIQRAAGSASNESVDRLPSTSATCMNL  
LKLPPYQSKELLETKLMYAISAEAGFDLS  
>AT1G55860/UPL1  
MAIAEEVTVFAETSLGTRIVMAVPLDITAADFKRKLEKTHASCLSSVGEI  
EVHGLMVKRKSRFYHLVESVPIRYIFLDNQKPFTHAEARVVSRSQESSV  
SNSIDKTHIRHCHGSDNSIERVTALIQGDKKIKKSRASDSRNVASGQE  
TCLDKREYLGSTSEPETIKSLPSIARVAEMKNSECFKSFTPKPKPERKPV  
DSESESIGKRITVAANNIRMQGKTHNSSSLSSSIFRSNSCRNRSIDGKII  
TSLAKFMVFEPSPKIKSFINSVTSVPLELIEHPLACFRWEFDKGFHHWVD  
LFNYFDTFFEKHVQVRKDLHIEENFEESDPFPKDAVLQVLRVIRVVLEN  
CTNKHFYSSYEQHLSLLLASTDADVVEACLQTLAAFLKRQIGKYISIRDA  
LNSKLFSLAQGWGKKEEGLTSCAAENSCDQVSLQLGRTLHFEFYPSDE  
SPSELPGGLQVIHVDPVSCAESDLELLNKLVIDHNVPPSLRFALLTRMR  
FARAFSSSLATRQQFTCIRLYAFVVLVQASGDTENVVSFFNGEPEFVNELV  
TLVSIEDTVPEKIRILCLLSLVALSQDRTRQPTVLTAVTSGGHRGLLSGL  
MQKAIDSVVCITSKWSLAFAEALLSLVTVLVSSSSGCSAMREAGLIPTLV  
PLIKDTPDQHLHLVSAAVHILEAFMDYSNPAAALFRDLGGLDDTIFRLKL  
EVSRTEDDVKEKNCSSDSNGPDTEQLPYSEALISYHRRLLKALLRAISL  
GTYPAGNTNLYGSEESLLPECLCIIFRRAKDFGGGVFSLAATVMSDLIHK  
DPTCFNALDSAGLTSTFLDAISDEVICSAEAITCIPQCLDALCLNNSGLQ  
AVKDRNALRCFVKIFTSPSYLRALTGDTPGSLSSGLDELRRHQSSLRTYG  
VDMFIEILNSMLIIGSGMEATTSSKADVPTSAPVPMEDVDDEKSLAVSD  
EAEPSDTSANIELFLPDCVCNVARLFETVLQNAEVCSLFVEKKGIDAV  
LQLFSLPLMPLSTSLGQSFSVAFKNFSPQHSAGLARIVCSYLREHLKKT  
ILLVSIETQLLLKESAIQTKILRSLSCLEGMLSLSNFFLLKGSASVISEL  
SAADADVLKELGITYKQTIWQMALCNDTKEDEKKSVDGSDNSVSASSST  
AERESDESSNALAVRYTNPVSISSSSQSIWGGDREFLSIVRSGEIGH  
RTRHAIARMRGGRTRRHLESFNFDEIPADLPVTSSSHELKKKSTEVLIA  
EILNKLNCTLRFFFTALVKGFTSANRRRIDGASLSSASKTLGTALAKVFL  
EALNFDGYGAAAGHEKSLSVKCRYLGKVVDDITFLSFDTRRRVCFTAMVN  
SFYVHGTFKELLTTFEATSQLLWTVPFSPASSTENEKPGERNIWSHKKW

LVDTLQNYCRALDYFVNSTYLLSPTSQTQLLVQPASVGLSIGLFPVPREP  
ETFVRNLQSQVLDVILPIWNHPMFPDCNPNFVASVTSLVTHIYSGVVDAR  
ENRSGVTRGINQRALPLQLDESI VGMIVEMGFSSRAEIALRRVGTNSVE  
MAMDWLFTNPEQPVQEDDELAQALALS LGNSSETPKLEDTEKPVDPQEE  
AEPKEPPVDEVIAASQLKLVQLDFS KDTGALTMIPHILALVLS EDDNTRE  
IAAQDGI VTV AIGILTDFNLKSESETEILAPKCI SALLVL SMLLQAQTK  
LSSEYVEGNQGGSLVPSDSPQDSTAALKDALSSDVAKGESNQALELIFGK  
STGYLTMEEGHKALLIACGLIKQHV PAMIMQAVLQLCARLTKSHALAIQF  
LENGGLSSLFNLPKKCCFPGYDTVASVIVRHLVEDPQTLQIAMETEIRQT  
LSGKRHRIGRVLPRTFLT TMAPVISRDPVVF MKAVASTCQLESSGGRDFVI  
LSKEKEKPKVSGSEHGFS LNEPLGIS ENKLHDVSGKCSKSHRRVPANFIQ  
VIDQLIDLVL SFP RVKRQEDGETNLISMEVDEPTTKVKGKSKVGEPEKAS  
SSRVGEPEKAEIPEKSEELARVTFILKLLSDIVLMYSHGTSVILRRDTEI  
SQLRGSNL PDDSPGNGLIYHVIHRLLPISLEK FVGPEEWKEK LSEKASW  
FLVVLCSRSNEGRKRI INELSRVLSVFASLGRSSSSKSVLLPDKRVLAFAN  
LVYSILTKNSSSSSSSNFP GCGCSPDVAKSMMDGGTIQCLTSILHVIDLDH  
PDAPKLVTLILKSLET LTRAANAAEQLKSEVPNEKKNRSDERHDSHGNS  
TETEAD E L NQNNSSLQQVTD AAGNGQEQAQVSSQSAGERGSSQTQAMPQD  
MRIEGDETILPEPIQMDFMREEIEGDQIEMS FHVENRADDVDDDDMGDEG  
EDDEGDDADLVEDGAGVMSLAGTDVEDPEDTGLGDEYNDDMDVEDDDDD  
FHENRVIEVRWREALDGLDHFQILGRSGGGNGFIDDITAEFFEGVNVDDL  
FALRRPLGFERRRQTGRSSLDRSGSEVHGFQHPLFSRPSQTGNTASVSAS  
AGSISRHSEAGSYDVAQFYMFDT PVLFPDQVPVPD PFSARLAGGGAPPLT  
DYSVVGMDSRRRGVGD SRWTDIGHPQPSLSASIAQLIEEHFISNLRASA  
PVNTVVERETNTTEIQEQLHPDVPPSVGSETVLGDGNEGQQQSEERELLN  
NNENVNPNPDVMAESFAQQQANLASPVSQDTGESLQQLEVMPQLPLNSTP  
NEIDRMEVGE G D G A P I D Q V D H E A V H L I S T A Q G Q P D T S S I Q N V S V T A I A P P  
VDDPNSNFQPSVDVDMSSDGAEGNQSVQPSPLDGDNNELSSMEATENVRN  
DEQVEEGSLDGRAPEVNAIDPTFLEALPEDLRAEVLASQQAQSVQPPTYE  
PPPVDIDPEFLAALPPDIQTEVLAQQRAQRMVQQSQGQAVMDMDNASIIA  
TLPADLREEVLLTSSEAVLAALPSPLLAEAQMLRDRAMSHYQARSSVFGS  
SHRLNNRRNGLGYNRLTGMDRGGVGTIGQRAVSSADGLKVKEIEGDPLV  
NADALKSLIRLLRLAQPLGKGLLQRLLLNLCAHSFTRANLVQLLLDMIRP  
EMETSPSELAITNPQRLYGCQSNVVYGRSQLLNGLPPLVFRRVLEVLTYL  
ATNHSAVADMLFYFDSSLLS QLS SRK G K E K V T H V T D S R D L E I P L V V F L K L  
LNRPQLQSTSHLGLVMGLLQVVVYTAASRIEGWSPSSGVPKLENKPVG  
EEASSETRKDAESELVGEADLSVARRKNCAEIYNI FLQLPQSDLCNLCIL  
LGYEGLSDKIYSLAGEVLKKLAADV AHRKFFTKELSELASSLSSTVRE  
LATLSSKQKMSRSTGSMAGASILRVLQVLSLSTSPIDESNVGTERETEQE  
EQNIMQRLNVALEPLWHEL S Q C I S M T E L Q L D H T A A S N I N P G D H V L G I S P  
TSSLSPGTQRLPLLIEAFFVLCEKIQTPSMLQDDTNVTAGEVKESSAHGS  
SSKTSVDSQKKT D G S V T F S K F A E K H R R L L N S F I R Q N P S L L E K S L S M M L K A  
PRLIDFDNKKAYFRSRIRHQHDQHISGPLRISVRRAYVLEDSYNQLMRMS  
PQDLKRLNVQFQGE E G I D A G G L T R E W Y Q L L S R V I F D K G A L L F T T V G N D A  
TFQPNPNSVYQTEHLSYFKFVGRMVAKALFDGQLLDVYFTRSFYKHILGV  
KVTYHDIEAVDPDYYKNLKWLENDVSDILDLTFSMDADEEKHILYEKTE  
VTDYELKPGGRNIRVTEETKHEYVDLVAGHILTNAIRPQINAFLEGFNEL  
IPRELVSIFNDKELELLISGLPEIDFDDLKANTEYTSYTAGSPVIHWFWE  
VVKAFSKEDMARFLQFVTGT SKVPLEGFKALQGISGPQRLQIHKAYGAPE  
RLPSAHTCFNQLDLPEYQSKEQLQERLLLA I H E A S E G F G F A  
>AT3G53090/UPL7  
MDLNRKHKVSLRGASSGEISR DALLAKVSQERELRSYARRANAASLFIQR  
VWRSYIVRKKAAIEIQEEWENLLSCHSVTLTKSWVSSRVLRPFLFFVRSL  
SVQHQQIQAREIHCMQTCFKILLESINSNDQGYNFCSLAVGTSEDSKTWA  
CQTRRMVSLCSFLLTECNYSQERIKDVI GVNALLRILIVLTDPKSWKII  
TNENFEDAETAKKII IQFIGSCKSGYSAVRRYIKTLTKHTDERLIVTTS  
AVTLALRPFHV K Q P A F V D D N Q P D T N L A V E E Y V S L I L T I P R L V C Y L S A L I  
RALKHKSILMPSFHTILLLKDKILNIISEMENSEKQSC TMEIPSVGWVIG  
NII SLATVSETDFMDPQESNPEMFYVLYVHVIVTLAENLLSQVESVGIQD  
IHLDIEATSNETEKGN SVKISFVEMLRPVCQQWHLAKLLAASGKEIRVIA  
DKDASTSSKKSETLGLLDIARLYSCMLRIFCVMPNPVLGPLPVLNMLSFC  
PGYIVSLWNSLESVLLPENGCTADDASHGSAKTSWNTRSPSEKKLKH LKN  
DSVNKWVNVNLKFSGKSPGP REHVECTSDQPGSGQVNESTNDVVDVETLR  
GGPVGISKEVSCLLHLFCATYAHLLVVLDDIQFYEKQVPFMLEKQQRIAS  
MLNTLVYYGLLRGTGPESRQLMDSAIRCLHLLYERDCRH PFCASALWLS P  
GRTSRPPIAFAARTHEVLPTSDVLTTPSMGSVITITPHVFPFEERVHVFR  
EFISKDKASRK MAGEVDAPGARSIEIVVRRGHVVEDG FQQLNSIGSR LKS  
SIHVSFVNESGLPEAGLDYGGLSKEFLTDITKA AFATEYGLFSQTPTSDR  
LLVPSPSARHLENGIQMIEFLGRIVGKALYEGILLDYSFSHVFIQKLLGR  
YSFIDELSGLDPELYRNLMYVKHYDGD LKELCLDFTVTTEFCGKMSIEL  
KPGGKDTSVTNENKMQYIHAMADYKLNRIQVPFSNAFYRGLTDLISPAWL  
KLFNAHEFNQLLSGGNHDIDVDDLRRNTKYTGGYS DSSRTIKIFWEVMKG  
FEPSECLLLKFVTS CSRAPLLGF KYLQPTFI IHKVS CDTS LWA AIGGQD  
VERLPSASTCYNTLKLPTYKRASTMREKLLYAITSNAGFELS  
>AT1G70320/UPL2  
MKLRRRRASEVP TKISLFIN SVTSVPLELIQEPLASFRWEFDK GDFHHWV  
DLFYHFDTF FEKHVKVRKDLRIEEFDESDPPFPKDAVLQVLRVIRLVLE  
NCTNKQFYTSYEQHLSLLLASTDADVVEACLQT LA AFLKRPTGKYSIRDA  
SLNLKLFSLAQGWGGKEEGLGLTSCATEHSCDQLFLQLGCTLLFEFYASD  
ESPSELPGGLQVIHVDPVSMRSESDLELLNKLVIDHNVPSPSLRFALLTRL  
RFARAFSSLATRQQYT CIRLYAFIVLVQASGD TENNVVSFFNGEPEFVNEL

VTIVSYEDTVPKIRILCLQSLVALSQDRTRQPTVLTAVTSGGHRGLLSG  
LMQKAIDSVICNTSKWSLAFAEALLSLVTVLVSSSSGCSAMREAGLIPTL  
VPLIKDTPQHHLVSTAVHILEVFM DYSNPAAALFRDLGGLDDTIFRLK  
QEVSRTEDDVKEIVCCSGSNGPEDDTEQLPYSEALISYHRRLLKALLRA  
ISLGTYPAGNTNLYGSEESLLPECLCIIFRRAKDFGGGVFSLAATVMSDL  
IHKDPTCFNALDSAGLTS AFLDAISDEVICSAEAITCIPQCLDALCLNNS  
GLQAVKDRNALRCFVKIFSSPSYKALTS DTPGSLSSGLDELLRHQSSLR  
TYGVDMFIEILNSILIIIGSGMEATTSK SADVPTDAAPVPM EIDVDEKSLA  
VSDEAEPSDSTSPANIELFLPDCVCNVARLFETVLQNAEVC SLFVEKKGI  
DTVLQLFSLPLMPLSTSLGQSFSVAFKNFSPQHSAGLARILCSYLREHLK  
KTNNLLVSI EGTQLLKLES AVQTKILRSLSCLEGMLSLSNFLLKGSASVI  
SELSAANADVLKELGITYKQTIWQMALCNDTKEDEKKSVDRA SDNSVSAS  
SSTAERESDEDSSNALAVRYTNPVSIRSSSSQSIWGGHREFLSVVRSGRG  
VHGHTRHAIARMRGGRTRRHLESFNFDSEIPADLPVTSSSHELKKKSTEV  
LIAEILNKLNCTLRFFFTS LVKGFTSANRRRIDGPSLSSASKTLGTALAK  
VFLEALNFQGYGAAAGPDTSLSLKC RYLKGKVDDITFLTFDTRRRVCFTA  
MVNSFYVHGT FKELLTTFEATS QLLWKVPFSIRASSTENEKSGERNLWSH  
SKWLVDTLQNYCRALDYFVNSTYLLSPTSQTQLLVQPASVDLSIGLFPVP  
REPETFVRNLQSQVLEVILPIWNHPMFPDCNPNFVASVTS LVTTHYSGVV  
DTRENRS GATQGTNQRALPLQ PDEAIVGMIVEMGF SRSAEDALRRVGTN  
SVEMAMDWLFTNPEDPVQEDDELAQALALSLGNSSETPKLEDTEKPDVDP  
QEEAEPKEPPVDEVIAASVKLFQSDDSIAFPLVDLFVTL CNRNKGEDRPK  
IVFYLIQQKLKVLQDFSKDTGALTMIPHILALVLS EDDNTREIAAQDGI V  
AVAIGILTDFTNLKSESETDILAPKCISALLVLVSMMLQAQTRLSSEYVEG  
NQGGSVLVLSDPQDSTAALKDALSSDVAKGESNQALES MF GKSTGYLTME  
ESSKVLLIACGLIKQRPAMIMQAVLQLCARLTKSHALATQFLENGGLSS  
LFNLPKKCFPPGYDTVASVIVRHLVEDPQTLQIAMETEIRQTL SGKRHIG  
RVLPRTFLTMTAPVISRDPVVFMKAVASTCQLESSGGTDFVILTKEKEKP  
KVS GSEHGFSLNEPLGISENKLHDGSGKCSKSHRRVPTNFIQVIDQLIDI  
VLSPFGLKRQEGE AANLISMDVDEPTTKVKGSKVGEPEKAELGSEKSEE  
LARVTFILKLLSDIVLMLHGTSVILRRDTEISQLRGSNLPPDSPGN GGL  
IYHVIHRLLPISLEKFVGPEEWKEKLSEKASWFLVVLCSRSNEGRKRIIN  
ELTRVLSVFASLGRSSSQSVLLPDKRVLAFANLVYSILTKNSSSNFP GC  
GCSPDVAKSMIDGGTIQCLTSILNVIDLDHPDAPKLVTLILKSLETLTRA  
ANAAEQLKSEVPNEQKNTDSDERHDSHGTSSTSTEVD ELNQNNSSLQQVTD  
AVDNGQE PQVSSQSEGERGSSLQAMLQEMRIEGDETI LPEPIQMDFFR  
EEIEGDQIEMS FHVEDRADDDVD DDDMDDEGEDDEGDD EDA SVEDGAGVM  
SIAGTDVEDPEDTGLGDEYNDMDVDEDEDEDEYNDMDVDEDEDEDEYN  
DDMVDEDEDDFHETRVIEVRWREALDGLDHFQIVGRSGGGNGFID DITAE  
PFEGVNVDDL FALRRSLGFERRRQTGRSSFDRSGSEVHG FQHPLFSRPSQ  
TGNTASVSASAGSISRHSEAGSYDVAQFYMFDSPVLPFDQVPVDPFSDRL  
GGGAPPPLT DYSVVGMDSSRRGVGDSRWTDVGHQPQSSLSASIAQLIEE  
HFITNLRASAPVDTVVERETNTTEVQEQQPDVPPSVGSETVLGDGNEG G  
EQSEEHLLNNNEVMHPLPLNSTPNEIDRMEVGE GGGAPIEQVDREAVHL  
ISSAQGQS DTSGIQNVSVTAIPPPVDDPDSNFQPSVDVDMSSDGAEGNQ S  
VQPSPLDGDNNELSSMEATQDVRNDEQVDEGSLDGRAPEVNAIDPTFLEA  
LPEDLRAEVLASQQAQSVQPPTYEPPSVDDIDPEFLAALPPEIQREVLAQ  
QRAQRMLQQSQGQPVMDNASIIATLPADLREEVLLTSSEAVLAALPPPL  
LAEAQMLRDRAMRHYQARSRVFGSSHRLNRRNGLGYRLTGMERGVGVTI  
GQRDVSSSADGLKVKEIEGDPLVNADALKSLIRLLRLAQPLGKGLLQRL L  
LNLCAHSFTRANLVQ LLLDMIRPEMETLPSELALTNPQRLYGCQLNVVYG  
RSQ LNLGLPPLVFRRVLEVLTYLATNHS AVADMLFYFDSSLLS QLSSRKG  
KEKVTHETDSRDLEIPLVVFLKLLNRPQLLQSTSHLALVMGLLQVVVYTA  
ASRIEGWSPSSGVPEKLENKPVGEEASSETQKDAESEL SVARRKNCAELY  
NIFLQLPQSDLCNLCMLLGYEGLSDKIYSLAGEVLKKLAAVDVTHRKFFT  
KELSELASGLSSSTVRVLATLSTTQKMSQNTCSMAGASILRVLQVLS SLT  
STIDDSNVGTDKETDQEEQNIMQGLKVALEPLWQELGQCISMTELQLDHT  
AATSNVNP GDHVLGISPTSSLSPGTQSLPLIEAFFVLCEKIQT PSM LQQ  
DATVTAGEVKESSTHGSSSKTIVDSQKKIDGSVTF SKFVEKHRRLLNSFV  
RQNP SLLKSF SMM LKAPRLIDFDNKKAYFRSRIRHQHDQHISGPLRISV  
RRAYVLED SYNQLRMRS PQDLKGRLNVQFQGE EGDAGGLTREWYQLLSR  
VIFDKALLFTTVGN DATFQPNPNSVYQTEHLSYFKFVGRMVAKALFDGQ  
LLDVYFTRSFYKHILGVKVTYHDI EAVDPDYK NLKWLLENDVSDILDLT  
FSMDADEEKHILYEKTEVTDYELKPGGRNIRVTEETKHEYVDLVADHILT  
SAIRPQINAFLEGLNELIPRELVSIFNDKELELLISGLPEIDFDDLKANT  
EYTSYTVGSPVIRWFWEVVKAFSKEDMARFLQFVTGTSKVPLEGFKALQG  
ISGFQRLQIHKAYGSPERLPSAHTCFNQLDLPEYQSKEQVQERLLAIHE  
ANEGFGFA
